# Supplementary material for: Genome-wide identification, characterization and expression analysis of the DUF668 gene family in tomato
Source: PeerJ. 2024 Jun 18;12:e17537. doi: 10.7717/peerj.17537 (PMC11192028; doi:10.7717/peerj.17537)
Supplement: Data S1 [file peerj-12-17537-s007.xls]

## Sheet: Sheet1
Supplementary File 1. Raw data of SlDUF668s expressions under different treatment for data analyses and preparation for Figure 8.
Gene Name	Sample Name	2-∆∆CT
SlDUF668-01	SA-0h-Re1	0.870953
	SA-0h-Re2	1.04006
	SA-0h-Re3	1.10394
	SA-1.5h-Re1	0.265172
	SA-1.5h-Re2	0.259535
	SA-1.5h-Re3	0.245535
	SA-3h-Re1	0.323014
	SA-3h-Re2	0.343806
	SA-3h-Re3	0.319673
	SA-9h-Re1	0.221442
	SA-9h-Re2	0.199575
	SA-9h-Re3	0.221903
	SA-12h-Re1	0.857772
	SA-12h-Re2	0.814319
	SA-12h-Re3	0.872766
	SA-24h-Re1	0.582098
	SA-24h-Re2	0.513463
	SA-24h-Re3	0.63171
	MeJA-0h-Re1	1.02125
	MeJA-0h-Re2	0.941044
	MeJA-0h-Re3	1.04054
	MeJA-1.5h-Re1	1.04826
	MeJA-1.5h-Re2	1.14631
	MeJA-1.5h-Re3	1.07252
	MeJA-3h-Re1	1.2858
	MeJA-3h-Re2	1.31282
	MeJA-3h-Re3	1.38287
	MeJA-9h-Re1	0.0886952
	MeJA-9h-Re2	0.0786723
	MeJA-9h-Re3	0.0942084
	MeJA-12h-Re1	0.536754
	MeJA-12h-Re2	0.45544
	MeJA-12h-Re3	0.496317
	MeJA-24h-Re1	0.929161
	MeJA-24h-Re2	1.00765
	MeJA-24h-Re3	1.04972
	GA-0h-Re1	0.933464
	GA-0h-Re2	0.99424
	GA-0h-Re3	1.07748
	GA-1.5h-Re1	9.53126
	GA-1.5h-Re2	9.58426
	GA-1.5h-Re3	9.28992
	GA-3h-Re1	0.12345
	GA-3h-Re2	0.147522
	GA-3h-Re3	0.155071
	GA-9h-Re1	0.186597
	GA-9h-Re2	0.198196
	GA-9h-Re3	0.171229
	GA-12h-Re1	0.191224
	GA-12h-Re2	0.187418
	GA-12h-Re3	0.168911
	GA-24h-Re1	0.34764
	GA-24h-Re2	0.406032
	GA-24h-Re3	0.368993
	IAA-0h-Re1	1.01209
	IAA-0h-Re2	0.95022
	IAA-0h-Re3	1.03982
	IAA-1.5h-Re1	0.740549
	IAA-1.5h-Re2	0.786581
	IAA-1.5h-Re3	0.930235
	IAA-3h-Re1	0.496891
	IAA-3h-Re2	0.4793
	IAA-3h-Re3	0.43167
	IAA-9h-Re1	0.301522
	IAA-9h-Re2	0.323387
	IAA-9h-Re3	0.331328
	IAA-12h-Re1	0.356506
	IAA-12h-Re2	0.353799
	IAA-12h-Re3	0.317538
	IAA-24h-Re1	1.19803
	IAA-24h-Re2	1.17175
	IAA-24h-Re3	1.05604
	ABA-0h-Re1	0.99424
	ABA-0h-Re2	0.961039
	ABA-0h-Re3	1.04657
	ABA-1.5h-Re1	0.127863
	ABA-1.5h-Re2	0.135622
	ABA-1.5h-Re3	0.117495
	ABA-3h-Re1	0.106974
	ABA-3h-Re2	0.105136
	ABA-3h-Re3	0.0848662
	ABA-9h-Re1	0.120519
	ABA-9h-Re2	0.133539
	ABA-9h-Re3	0.112604
	ABA-12h-Re1	0.237885
	ABA-12h-Re2	0.2539
	ABA-12h-Re3	0.232666
	ABA-24h-Re1	8.11918
	ABA-24h-Re2	8.82951
	ABA-24h-Re3	7.58597
SlDUF668-02	SA-0h-Re1	0.981232
	SA-0h-Re2	1.06044
	SA-0h-Re3	0.961039
	SA-1.5h-Re1	1.85189
	SA-1.5h-Re2	1.73989
	SA-1.5h-Re3	1.56266
	SA-3h-Re1	1.36857
	SA-3h-Re2	1.28758
	SA-3h-Re3	1.3896
	SA-9h-Re1	0.337978
	SA-9h-Re2	0.350139
	SA-9h-Re3	0.390123
	SA-12h-Re1	0.707434
	SA-12h-Re2	0.638459
	SA-12h-Re3	0.792052
	SA-24h-Re1	0.198654
	SA-24h-Re2	0.209836
	SA-24h-Re3	0.250058
	MeJA-0h-Re1	0.952638
	MeJA-0h-Re2	1.04826
	MeJA-0h-Re3	1.00139
	MeJA-1.5h-Re1	1.56881
	MeJA-1.5h-Re2	1.45162
	MeJA-1.5h-Re3	1.6814
	MeJA-3h-Re1	1.29355
	MeJA-3h-Re2	1.2086
	MeJA-3h-Re3	1.06609
	MeJA-9h-Re1	0.173259
	MeJA-9h-Re2	0.178624
	MeJA-9h-Re3	0.199022
	MeJA-12h-Re1	0.161656
	MeJA-12h-Re2	0.1568
	MeJA-12h-Re3	0.131033
	MeJA-24h-Re1	0.487565
	MeJA-24h-Re2	0.480519
	MeJA-24h-Re3	0.434572
	GA-0h-Re1	0.998845
	GA-0h-Re2	0.97288
	GA-0h-Re3	1.02906
	GA-1.5h-Re1	2.89253
	GA-1.5h-Re2	2.71572
	GA-1.5h-Re3	2.88652
	GA-3h-Re1	0.41056
	GA-3h-Re2	0.394109
	GA-3h-Re3	0.356424
	GA-9h-Re1	0.41056
	GA-9h-Re2	0.330946
	GA-9h-Re3	0.353717
	GA-12h-Re1	0.714497
	GA-12h-Re2	0.718968
	GA-12h-Re3	0.708088
	GA-24h-Re1	0.298403
	GA-24h-Re2	0.313673
	GA-24h-Re3	0.286644
	IAA-0h-Re1	1.0745
	IAA-0h-Re2	0.92445
	IAA-0h-Re3	1.00672
	IAA-1.5h-Re1	2.13317
	IAA-1.5h-Re2	2.32947
	IAA-1.5h-Re3	2.16595
	IAA-3h-Re1	3.85572
	IAA-3h-Re2	3.9204
	IAA-3h-Re3	3.9834
	IAA-9h-Re1	4.61714
	IAA-9h-Re2	4.4168
	IAA-9h-Re3	4.13246
	IAA-12h-Re1	5.08883
	IAA-12h-Re2	4.44238
	IAA-12h-Re3	4.06804
	IAA-24h-Re1	5.16941
	IAA-24h-Re2	5.25613
	IAA-24h-Re3	5.36285
	ABA-0h-Re1	0.919125
	ABA-0h-Re2	1.02196
	ABA-0h-Re3	1.06462
	ABA-1.5h-Re1	11.1476
	ABA-1.5h-Re2	10.3221
	ABA-1.5h-Re3	11.8078
	ABA-3h-Re1	1.23656
	ABA-3h-Re2	1.22632
	ABA-3h-Re3	1.21869
	ABA-9h-Re1	1.72788
	ABA-9h-Re2	1.69702
	ABA-9h-Re3	1.93321
	ABA-12h-Re1	0.573554
	ABA-12h-Re2	0.615572
	ABA-12h-Re3	0.534033
	ABA-24h-Re1	0.415619
	ABA-24h-Re2	0.487452
	ABA-24h-Re3	0.465978
SlDUF668-03	SA-0h-Re1	1.06807
	SA-0h-Re2	0.883928
	SA-0h-Re3	1.05922
	SA-1.5h-Re1	1.50143
	SA-1.5h-Re2	1.62939
	SA-1.5h-Re3	1.67172
	SA-3h-Re1	7.06162
	SA-3h-Re2	6.63916
	SA-3h-Re3	7.04695
	SA-9h-Re1	2.99661
	SA-9h-Re2	3.23403
	SA-9h-Re3	2.69696
	SA-12h-Re1	1.48555
	SA-12h-Re2	1.29594
	SA-12h-Re3	1.36415
	SA-24h-Re1	0.680028
	SA-24h-Re2	0.708415
	SA-24h-Re3	0.656409
	MeJA-0h-Re1	1.02456
	MeJA-0h-Re2	0.99585
	MeJA-0h-Re3	0.980099
	MeJA-1.5h-Re1	2.74981
	MeJA-1.5h-Re2	2.56389
	MeJA-1.5h-Re3	2.22427
	MeJA-3h-Re1	1.6468
	MeJA-3h-Re2	1.53227
	MeJA-3h-Re3	1.39926
	MeJA-9h-Re1	0.505226
	MeJA-9h-Re2	0.5
	MeJA-9h-Re3	0.559419
	MeJA-12h-Re1	0.644834
	MeJA-12h-Re2	0.663883
	MeJA-12h-Re3	0.535515
	MeJA-24h-Re1	1.95568
	MeJA-24h-Re2	2.22324
	MeJA-24h-Re3	1.72628
	GA-0h-Re1	0.992175
	GA-0h-Re2	1.01232
	GA-0h-Re3	0.99562
	GA-1.5h-Re1	2.37128
	GA-1.5h-Re2	2.3549
	GA-1.5h-Re3	2.47027
	GA-3h-Re1	0.706454
	GA-3h-Re2	0.736454
	GA-3h-Re3	0.865537
	GA-9h-Re1	0.39202
	GA-9h-Re2	0.408384
	GA-9h-Re3	0.372161
	GA-12h-Re1	0.558773
	GA-12h-Re2	0.589406
	GA-12h-Re3	0.606397
	GA-24h-Re1	0.405751
	GA-24h-Re2	0.38413
	GA-24h-Re3	0.388683
	IAA-0h-Re1	0.974905
	IAA-0h-Re2	1.0163
	IAA-0h-Re3	1.00928
	IAA-1.5h-Re1	2.24285
	IAA-1.5h-Re2	2.54971
	IAA-1.5h-Re3	3.88882
	IAA-3h-Re1	1.49278
	IAA-3h-Re2	1.75321
	IAA-3h-Re3	1.74957
	IAA-9h-Re1	2.61051
	IAA-9h-Re2	2.72704
	IAA-9h-Re3	2.42055
	IAA-12h-Re1	1.54221
	IAA-12h-Re2	1.40347
	IAA-12h-Re3	1.22859
	IAA-24h-Re1	2.00648
	IAA-24h-Re2	1.60177
	IAA-24h-Re3	1.8374
	ABA-0h-Re1	1.14578
	ABA-0h-Re2	0.95022
	ABA-0h-Re3	0.918488
	ABA-1.5h-Re1	11.8817
	ABA-1.5h-Re2	12.4034
	ABA-1.5h-Re3	10.9866
	ABA-3h-Re1	0.681286
	ABA-3h-Re2	0.830662
	ABA-3h-Re3	0.691276
	ABA-9h-Re1	1.15589
	ABA-9h-Re2	1.12428
	ABA-9h-Re3	0.960595
	ABA-12h-Re1	0.52015
	ABA-12h-Re2	0.44013
	ABA-12h-Re3	0.554016
	ABA-24h-Re1	0.361817
	ABA-24h-Re2	0.434773
	ABA-24h-Re3	0.350706
SlDUF668-04	SA-0h-Re1	1.08473
	SA-0h-Re2	0.897095
	SA-0h-Re3	1.02764
	SA-1.5h-Re1	1.21869
	SA-1.5h-Re2	1.35129
	SA-1.5h-Re3	1.27662
	SA-3h-Re1	3.83351
	SA-3h-Re2	4.07462
	SA-3h-Re3	4.22124
	SA-9h-Re1	1.42044
	SA-9h-Re2	1.32073
	SA-9h-Re3	1.35035
	SA-12h-Re1	1.00023
	SA-12h-Re2	1.10906
	SA-12h-Re3	0.984411
	SA-24h-Re1	0.585199
	SA-24h-Re2	0.604578
	SA-24h-Re3	0.53663
	MeJA-0h-Re1	0.9204
	MeJA-0h-Re2	1.08473
	MeJA-0h-Re3	1.00162
	MeJA-1.5h-Re1	17.9677
	MeJA-1.5h-Re2	19.7165
	MeJA-1.5h-Re3	17.2
	MeJA-3h-Re1	6.26653
	MeJA-3h-Re2	7.33942
	MeJA-3h-Re3	5.91208
	MeJA-9h-Re1	1.1829
	MeJA-9h-Re2	1.34754
	MeJA-9h-Re3	1.2643
	MeJA-12h-Re1	1.59402
	MeJA-12h-Re2	1.45062
	MeJA-12h-Re3	1.38767
	MeJA-24h-Re1	10.3891
	MeJA-24h-Re2	10.0074
	MeJA-24h-Re3	11.1348
	GA-0h-Re1	1.02456
	GA-0h-Re2	0.922103
	GA-0h-Re3	1.05848
	GA-1.5h-Re1	2.36035
	GA-1.5h-Re2	2.41162
	GA-1.5h-Re3	2.18859
	GA-3h-Re1	0.598324
	GA-3h-Re2	0.699308
	GA-3h-Re3	0.546768
	GA-9h-Re1	0.60193
	GA-9h-Re2	0.639788
	GA-9h-Re3	0.666495
	GA-12h-Re1	0.63787
	GA-12h-Re2	0.536011
	GA-12h-Re3	0.630397
	GA-24h-Re1	0.271935
	GA-24h-Re2	0.262854
	GA-24h-Re3	0.255135
	IAA-0h-Re1	1.04899
	IAA-0h-Re2	1.03526
	IAA-0h-Re3	0.920826
	IAA-1.5h-Re1	5.9656
	IAA-1.5h-Re2	5.82665
	IAA-1.5h-Re3	6.56442
	IAA-3h-Re1	3.99908
	IAA-3h-Re2	3.80176
	IAA-3h-Re3	3.51048
	IAA-9h-Re1	2.23871
	IAA-9h-Re2	2.09314
	IAA-9h-Re3	2.41273
	IAA-12h-Re1	3.36281
	IAA-12h-Re2	3.53
	IAA-12h-Re3	4.30397
	IAA-24h-Re1	4.28709
	IAA-24h-Re2	4.8804
	IAA-24h-Re3	4.53154
	ABA-0h-Re1	0.918064
	ABA-0h-Re2	1.01866
	ABA-0h-Re3	1.0693
	ABA-1.5h-Re1	0.828553
	ABA-1.5h-Re2	0.874583
	ABA-1.5h-Re3	1.01232
	ABA-3h-Re1	0.994011
	ABA-3h-Re2	0.847528
	ABA-3h-Re3	1.08098
	ABA-9h-Re1	1.23257
	ABA-9h-Re2	1.34599
	ABA-9h-Re3	1.43164
	ABA-12h-Re1	0.357249
	ABA-12h-Re2	0.32197
	ABA-12h-Re3	0.367038
	ABA-24h-Re1	0.203909
	ABA-24h-Re2	0.169576
	ABA-24h-Re3	0.161656
SlDUF668-05	SA-0h-Re1	1.0367
	SA-0h-Re2	0.942785
	SA-0h-Re3	1.02314
	SA-1.5h-Re1	0.713342
	SA-1.5h-Re2	0.678145
	SA-1.5h-Re3	0.62057
	SA-3h-Re1	1.8408
	SA-3h-Re2	2.3075
	SA-3h-Re3	2.13811
	SA-9h-Re1	0.692075
	SA-9h-Re2	0.791686
	SA-9h-Re3	0.806083
	SA-12h-Re1	0.24115
	SA-12h-Re2	0.253666
	SA-12h-Re3	0.272816
	SA-24h-Re1	0.0805298
	SA-24h-Re2	0.0867896
	SA-24h-Re3	0.0970362
	MeJA-0h-Re1	0.994011
	MeJA-0h-Re2	0.991259
	MeJA-0h-Re3	1.0149
	MeJA-1.5h-Re1	1.84719
	MeJA-1.5h-Re2	1.70212
	MeJA-1.5h-Re3	1.62038
	MeJA-3h-Re1	2.45831
	MeJA-3h-Re2	2.42951
	MeJA-3h-Re3	2.24181
	MeJA-9h-Re1	0.31129
	MeJA-9h-Re2	0.361066
	MeJA-9h-Re3	0.335488
	MeJA-12h-Re1	0.568671
	MeJA-12h-Re2	0.595704
	MeJA-12h-Re3	0.673928
	MeJA-24h-Re1	2.68328
	MeJA-24h-Re2	2.42839
	MeJA-24h-Re3	2.88786
	GA-0h-Re1	0.994011
	GA-0h-Re2	1.0485
	GA-0h-Re3	0.959486
	GA-1.5h-Re1	1.116
	GA-1.5h-Re2	1.19361
	GA-1.5h-Re3	1.03049
	GA-3h-Re1	0.240204
	GA-3h-Re2	0.223188
	GA-3h-Re3	0.205945
	GA-9h-Re1	0.248962
	GA-9h-Re2	0.261521
	GA-9h-Re3	0.255962
	GA-12h-Re1	0.247014
	GA-12h-Re2	0.222313
	GA-12h-Re3	0.2737
	GA-24h-Re1	0.174544
	GA-24h-Re2	0.200221
	GA-24h-Re3	0.163875
	IAA-0h-Re1	1.01654
	IAA-0h-Re2	0.941914
	IAA-0h-Re3	1.04439
	IAA-1.5h-Re1	6.34374
	IAA-1.5h-Re2	5.92302
	IAA-1.5h-Re3	6.6453
	IAA-3h-Re1	10.4348
	IAA-3h-Re2	10.0724
	IAA-3h-Re3	9.58204
	IAA-9h-Re1	0.675643
	IAA-9h-Re2	0.599709
	IAA-9h-Re3	0.665418
	IAA-12h-Re1	7.60703
	IAA-12h-Re2	6.77083
	IAA-12h-Re3	7.02907
	IAA-24h-Re1	5.85499
	IAA-24h-Re2	7.00637
	IAA-24h-Re3	6.72096
	ABA-0h-Re1	1.02645
	ABA-0h-Re2	0.956387
	ABA-0h-Re3	1.01866
	ABA-1.5h-Re1	0.435175
	ABA-1.5h-Re2	0.42681
	ABA-1.5h-Re3	0.421226
	ABA-3h-Re1	0.395386
	ABA-3h-Re2	0.459881
	ABA-3h-Re3	0.43417
	ABA-9h-Re1	0.411415
	ABA-9h-Re2	0.388683
	ABA-9h-Re3	0.483862
	ABA-12h-Re1	0.161544
	ABA-12h-Re2	0.170755
	ABA-12h-Re3	0.185694
	ABA-24h-Re1	0.0954573
	ABA-24h-Re2	0.103235
	ABA-24h-Re3	0.084553
SlDUF668-06	SA-0h-Re1	1.12194
	SA-0h-Re2	0.928517
	SA-0h-Re3	0.959929
	SA-1.5h-Re1	1.48452
	SA-1.5h-Re2	1.33886
	SA-1.5h-Re3	1.34164
	SA-3h-Re1	3.01746
	SA-3h-Re2	2.87255
	SA-3h-Re3	2.96973
	SA-9h-Re1	1.83401
	SA-9h-Re2	1.89868
	SA-9h-Re3	1.94261
	SA-12h-Re1	1.47939
	SA-12h-Re2	1.51152
	SA-12h-Re3	1.68997
	SA-24h-Re1	0.685708
	SA-24h-Re2	0.666495
	SA-24h-Re3	0.776828
	MeJA-0h-Re1	1.10701
	MeJA-0h-Re2	0.918064
	MeJA-0h-Re3	0.983957
	MeJA-1.5h-Re1	11.7996
	MeJA-1.5h-Re2	12.4984
	MeJA-1.5h-Re3	11.9975
	MeJA-3h-Re1	3.71407
	MeJA-3h-Re2	4.16697
	MeJA-3h-Re3	3.75549
	MeJA-9h-Re1	0.321524
	MeJA-9h-Re2	0.296273
	MeJA-9h-Re3	0.52268
	MeJA-12h-Re1	0.772711
	MeJA-12h-Re2	0.898132
	MeJA-12h-Re3	0.827023
	MeJA-24h-Re1	4.08499
	MeJA-24h-Re2	3.87806
	MeJA-24h-Re3	4.00647
	GA-0h-Re1	0.916369
	GA-0h-Re2	1.02101
	GA-0h-Re3	1.06881
	GA-1.5h-Re1	0.780245
	GA-1.5h-Re2	0.802181
	GA-1.5h-Re3	0.790589
	GA-3h-Re1	0.303128
	GA-3h-Re2	0.26554
	GA-3h-Re3	0.286181
	GA-9h-Re1	0.428886
	GA-9h-Re2	0.485878
	GA-9h-Re3	0.452085
	GA-12h-Re1	0.337822
	GA-12h-Re2	0.334559
	GA-12h-Re3	0.300895
	GA-24h-Re1	0.187939
	GA-24h-Re2	0.18471
	GA-24h-Re3	0.23315
	IAA-0h-Re1	1.11188
	IAA-0h-Re2	0.975355
	IAA-0h-Re3	0.922103
	IAA-1.5h-Re1	4.57044
	IAA-1.5h-Re2	4.49504
	IAA-1.5h-Re3	4.83104
	IAA-3h-Re1	4.48674
	IAA-3h-Re2	4.79213
	IAA-3h-Re3	5.05134
	IAA-9h-Re1	1.8374
	IAA-9h-Re2	2.27311
	IAA-9h-Re3	2.01484
	IAA-12h-Re1	4.20955
	IAA-12h-Re2	4.4219
	IAA-12h-Re3	4.78217
	IAA-24h-Re1	2.39164
	IAA-24h-Re2	2.61172
	IAA-24h-Re3	2.55797
	ABA-0h-Re1	1.00394
	ABA-0h-Re2	1.0502
	ABA-0h-Re3	0.948465
	ABA-1.5h-Re1	4.14297
	ABA-1.5h-Re2	4.74914
	ABA-1.5h-Re3	4.78881
	ABA-3h-Re1	6.85584
	ABA-3h-Re2	7.09761
	ABA-3h-Re3	7.10253
	ABA-9h-Re1	1.82218
	ABA-9h-Re2	2.09024
	ABA-9h-Re3	1.84634
	ABA-12h-Re1	0.417544
	ABA-12h-Re2	0.439825
	ABA-12h-Re3	0.390123
	ABA-24h-Re1	0.31864
	ABA-24h-Re2	0.339857
	ABA-24h-Re3	0.29689
SlDUF668-07	SA-0h-Re1	1.01771
	SA-0h-Re2	1.0536
	SA-0h-Re3	0.932602
	SA-1.5h-Re1	0.0471042
	SA-1.5h-Re2	0.0493092
	SA-1.5h-Re3	0.0430453
	SA-3h-Re1	0.0317302
	SA-3h-Re2	0.0347944
	SA-3h-Re3	0.0342679
	SA-9h-Re1	0.04007
	SA-9h-Re2	0.0338352
	SA-9h-Re3	0.0387319
	SA-12h-Re1	4.59692
	SA-12h-Re2	4.94396
	SA-12h-Re3	4.23003
	SA-24h-Re1	1.94666
	SA-24h-Re2	2.25793
	SA-24h-Re3	2.36854
	MeJA-0h-Re1	1.03144
	MeJA-0h-Re2	0.971756
	MeJA-0h-Re3	0.997692
	MeJA-1.5h-Re1	0.815072
	MeJA-1.5h-Re2	0.860353
	MeJA-1.5h-Re3	0.905634
	MeJA-3h-Re1	0.712354
	MeJA-3h-Re2	0.708906
	MeJA-3h-Re3	0.70989
	MeJA-9h-Re1	1.82176
	MeJA-9h-Re2	1.9661
	MeJA-9h-Re3	1.9203
	MeJA-12h-Re1	0.835667
	MeJA-12h-Re2	0.745355
	MeJA-12h-Re3	0.76313
	MeJA-24h-Re1	0.728836
	MeJA-24h-Re2	0.715323
	MeJA-24h-Re3	0.733906
	GA-0h-Re1	0.978063
	GA-0h-Re2	0.917004
	GA-0h-Re3	1.11497
	GA-1.5h-Re1	1.01466
	GA-1.5h-Re2	0.955283
	GA-1.5h-Re3	0.98214
	GA-3h-Re1	0.656409
	GA-3h-Re2	0.645579
	GA-3h-Re3	0.573819
	GA-9h-Re1	0.469002
	GA-9h-Re2	0.56749
	GA-9h-Re3	0.501968
	GA-12h-Re1	0.272123
	GA-12h-Re2	0.232022
	GA-12h-Re3	0.22772
	GA-24h-Re1	0.190342
	GA-24h-Re2	0.182588
	GA-24h-Re3	0.185009
	IAA-0h-Re1	0.989885
	IAA-0h-Re2	1.10599
	IAA-0h-Re3	0.913409
	IAA-1.5h-Re1	0.630834
	IAA-1.5h-Re2	0.606817
	IAA-1.5h-Re3	0.651724
	IAA-3h-Re1	1.67172
	IAA-3h-Re2	1.75119
	IAA-3h-Re3	1.58045
	IAA-9h-Re1	1.77769
	IAA-9h-Re2	1.72548
	IAA-9h-Re3	1.91189
	IAA-12h-Re1	1.91587
	IAA-12h-Re2	1.76296
	IAA-12h-Re3	1.72429
	IAA-24h-Re1	4.5096
	IAA-24h-Re2	3.98893
	IAA-24h-Re3	4.23394
	ABA-0h-Re1	0.948027
	ABA-0h-Re2	1.06881
	ABA-0h-Re3	0.986917
	ABA-1.5h-Re1	0.0451645
	ABA-1.5h-Re2	0.041936
	ABA-1.5h-Re3	0.0466601
	ABA-3h-Re1	0.038589
	ABA-3h-Re2	0.0405356
	ABA-3h-Re3	0.0376902
	ABA-9h-Re1	0.0661247
	ABA-9h-Re2	0.0632116
	ABA-9h-Re3	0.0545353
	ABA-12h-Re1	0.059074
	ABA-12h-Re2	0.0675766
	ABA-12h-Re3	0.0634018
	ABA-24h-Re1	0.0493776
	ABA-24h-Re2	0.0465524
	ABA-24h-Re3	0.0524832
SlDUF668-08	SA-0h-Re1	0.960595
	SA-0h-Re2	1.12039
	SA-0h-Re3	0.929161
	SA-1.5h-Re1	9.55993
	SA-1.5h-Re2	11.1657
	SA-1.5h-Re3	10.5341
	SA-3h-Re1	0.958821
	SA-3h-Re2	1.02693
	SA-3h-Re3	0.942349
	SA-9h-Re1	4.18627
	SA-9h-Re2	3.32342
	SA-9h-Re3	3.76244
	SA-12h-Re1	1.49589
	SA-12h-Re2	1.57243
	SA-12h-Re3	1.72907
	SA-24h-Re1	3.45655
	SA-24h-Re2	3.75115
	SA-24h-Re3	3.22284
	MeJA-0h-Re1	0.990801
	MeJA-0h-Re2	0.953078
	MeJA-0h-Re3	1.05897
	MeJA-1.5h-Re1	10.4904
	MeJA-1.5h-Re2	10.3532
	MeJA-1.5h-Re3	11.5996
	MeJA-3h-Re1	2.80629
	MeJA-3h-Re2	3.21912
	MeJA-3h-Re3	2.78691
	MeJA-9h-Re1	2.04675
	MeJA-9h-Re2	1.92831
	MeJA-9h-Re3	1.72947
	MeJA-12h-Re1	4.76013
	MeJA-12h-Re2	5.03852
	MeJA-12h-Re3	4.299
	MeJA-24h-Re1	5.30248
	MeJA-24h-Re2	4.93369
	MeJA-24h-Re3	5.03387
	GA-0h-Re1	1.04319
	GA-0h-Re2	0.982821
	GA-0h-Re3	0.975355
	GA-1.5h-Re1	2.05148
	GA-1.5h-Re2	2.18657
	GA-1.5h-Re3	2.48917
	GA-3h-Re1	0.27389
	GA-3h-Re2	0.281395
	GA-3h-Re3	0.25804
	GA-9h-Re1	0.427106
	GA-9h-Re2	0.432768
	GA-9h-Re3	0.494714
	GA-12h-Re1	0.21794
	GA-12h-Re2	0.245535
	GA-12h-Re3	0.259355
	GA-24h-Re1	0.377967
	GA-24h-Re2	0.415619
	GA-24h-Re3	0.347319
	IAA-0h-Re1	0.92445
	IAA-0h-Re2	1.06782
	IAA-0h-Re3	1.01302
	IAA-1.5h-Re1	0.64201
	IAA-1.5h-Re2	0.597358
	IAA-1.5h-Re3	0.695762
	IAA-3h-Re1	2.29846
	IAA-3h-Re2	2.56982
	IAA-3h-Re3	2.3354
	IAA-9h-Re1	2.06814
	IAA-9h-Re2	2.33647
	IAA-9h-Re3	2.26472
	IAA-12h-Re1	1.42438
	IAA-12h-Re2	1.21532
	IAA-12h-Re3	1.28283
	IAA-24h-Re1	1.32991
	IAA-24h-Re2	1.50039
	IAA-24h-Re3	1.34009
	ABA-0h-Re1	0.9544
	ABA-0h-Re2	1.06708
	ABA-0h-Re3	0.981913
	ABA-1.5h-Re1	1.74271
	ABA-1.5h-Re2	1.61814
	ABA-1.5h-Re3	1.84975
	ABA-3h-Re1	1.02835
	ABA-3h-Re2	0.894612
	ABA-3h-Re3	0.858169
	ABA-9h-Re1	1.74876
	ABA-9h-Re2	1.84591
	ABA-9h-Re3	1.61589
	ABA-12h-Re1	0.946495
	ABA-12h-Re2	1.19803
	ABA-12h-Re3	1.12013
	ABA-24h-Re1	0.492092
	ABA-24h-Re2	0.458184
	ABA-24h-Re3	0.440435
SlDUF668-09	SA-0h-Re1	1.12532
	SA-0h-Re2	0.974905
	SA-0h-Re3	0.911512
	SA-1.5h-Re1	1.28491
	SA-1.5h-Re2	1.18811
	SA-1.5h-Re3	1.10165
	SA-3h-Re1	0.606256
	SA-3h-Re2	0.613442
	SA-3h-Re3	0.641268
	SA-9h-Re1	0.162405
	SA-9h-Re2	0.165015
	SA-9h-Re3	0.152161
	SA-12h-Re1	0.0292247
	SA-12h-Re2	0.028465
	SA-12h-Re3	0.027023
	SA-24h-Re1	0.0181906
	SA-24h-Re2	0.0161573
	SA-24h-Re3	0.0170195
	MeJA-0h-Re1	1.02574
	MeJA-0h-Re2	1.00882
	MeJA-0h-Re3	0.966383
	MeJA-1.5h-Re1	4.80321
	MeJA-1.5h-Re2	5.12304
	MeJA-1.5h-Re3	5.19455
	MeJA-3h-Re1	2.05433
	MeJA-3h-Re2	2.26367
	MeJA-3h-Re3	2.06575
	MeJA-9h-Re1	0.939089
	MeJA-9h-Re2	0.82207
	MeJA-9h-Re3	0.884132
	MeJA-12h-Re1	1.11884
	MeJA-12h-Re2	1.07029
	MeJA-12h-Re3	1.06881
	MeJA-24h-Re1	2.60028
	MeJA-24h-Re2	3.05605
	MeJA-24h-Re3	2.37951
	GA-0h-Re1	1.01819
	GA-0h-Re2	1.03097
	GA-0h-Re3	0.952638
	GA-1.5h-Re1	1.14605
	GA-1.5h-Re2	1.11471
	GA-1.5h-Re3	1.05166
	GA-3h-Re1	0.373885
	GA-3h-Re2	0.325937
	GA-3h-Re3	0.425629
	GA-9h-Re1	0.224585
	GA-9h-Re2	0.183307
	GA-9h-Re3	0.21799
	GA-12h-Re1	0.397309
	GA-12h-Re2	0.380596
	GA-12h-Re3	0.387786
	GA-24h-Re1	0.201474
	GA-24h-Re2	0.189947
	GA-24h-Re3	0.177472
	IAA-0h-Re1	1.02645
	IAA-0h-Re2	1.01022
	IAA-0h-Re3	0.964375
	IAA-1.5h-Re1	2.04722
	IAA-1.5h-Re2	1.76867
	IAA-1.5h-Re3	1.85275
	IAA-3h-Re1	4.54622
	IAA-3h-Re2	4.16024
	IAA-3h-Re3	4.36405
	IAA-9h-Re1	2.01997
	IAA-9h-Re2	2.32517
	IAA-9h-Re3	2.16345
	IAA-12h-Re1	3.30351
	IAA-12h-Re2	2.70008
	IAA-12h-Re3	2.85205
	IAA-24h-Re1	3.14996
	IAA-24h-Re2	2.55679
	IAA-24h-Re3	2.94513
	ABA-0h-Re1	1.03526
	ABA-0h-Re2	1.08373
	ABA-0h-Re3	0.89131
	ABA-1.5h-Re1	1.74311
	ABA-1.5h-Re2	1.62864
	ABA-1.5h-Re3	1.83358
	ABA-3h-Re1	2.20942
	ABA-3h-Re2	2.6075
	ABA-3h-Re3	2.47712
	ABA-9h-Re1	4.51169
	ABA-9h-Re2	4.16601
	ABA-9h-Re3	4.06334
	ABA-12h-Re1	2.09943
	ABA-12h-Re2	2.57755
	ABA-12h-Re3	2.60088
	ABA-24h-Re1	0.528631
	ABA-24h-Re2	0.46792
	ABA-24h-Re3	0.510624
