# Supplementary material for: Genome-wide identification, characterization and expression analysis of the DUF668 gene family in tomato
Source: PeerJ. 2024 Jun 18;12:e17537. doi: 10.7717/peerj.17537 (PMC11192028; doi:10.7717/peerj.17537)
Supplement: SData S2 [file peerj-12-17537-s008.xls]

## Sheet: Sheet1
Supplementary File 2. Raw data of SlDUF668s expressions under different treatment for data analyses and preparation for Figure 9.
Gene Name	Sample Name	2-∆∆CT
SlDUF668-01	4℃-0h-Re1	0.951978
	4℃-0h-Re2	1.06216
	4℃-0h-Re3	0.988971
	4℃-1.5h-Re1	1.3435
	4℃-1.5h-Re2	1.4103
	4℃-1.5h-Re3	1.43694
	4℃-3h-Re1	3.35505
	4℃-3h-Re2	3.48784
	4℃-3h-Re3	3.67141
	4℃-9h-Re1	0.786762
	4℃-9h-Re2	0.868742
	4℃-9h-Re3	0.744839
	4℃-12h-Re1	2.78112
	4℃-12h-Re2	2.89521
	4℃-12h-Re3	3.02025
	4℃-24h-Re1	120.398
	4℃-24h-Re2	114.457
	4℃-24h-Re3	109.415
	PEG-0h-Re1	1.04198
	PEG-0h-Re2	0.948246
	PEG-0h-Re3	1.01209
	PEG-1.5h-Re1	2.78562
	PEG-1.5h-Re2	2.5403
	PEG-1.5h-Re3	2.98142
	PEG-3h-Re1	1.13603
	PEG-3h-Re2	0.942131
	PEG-3h-Re3	0.911933
	PEG-9h-Re1	0.962594
	PEG-9h-Re2	0.816769
	PEG-9h-Re3	0.843816
	PEG-12h-Re1	1.92697
	PEG-12h-Re2	1.68802
	PEG-12h-Re3	1.81169
	PEG-24h-Re1	11.1683
	PEG-24h-Re2	12.4006
	PEG-24h-Re3	12.332
	NaCl-0h-Re1	1.08298
	NaCl-0h-Re2	1.04681
	NaCl-0h-Re3	0.882091
	NaCl-1.5h-Re1	0.142201
	NaCl-1.5h-Re2	0.162668
	NaCl-1.5h-Re3	0.148651
	NaCl-3h-Re1	1.88035
	NaCl-3h-Re2	2.09072
	NaCl-3h-Re3	1.65519
	NaCl-9h-Re1	0.840508
	NaCl-9h-Re2	0.675175
	NaCl-9h-Re3	0.85106
	NaCl-12h-Re1	2.47655
	NaCl-12h-Re2	2.7651
	NaCl-12h-Re3	2.69509
	NaCl-24h-Re1	2.09507
	NaCl-24h-Re2	2.32302
	NaCl-24h-Re3	2.10526
SlDUF668-02	4℃-0h-Re1	1.00672
	4℃-0h-Re2	1.0895
	4℃-0h-Re3	0.911722
	4℃-1.5h-Re1	0.558902
	4℃-1.5h-Re2	0.532062
	4℃-1.5h-Re3	0.593643
	4℃-3h-Re1	1.01677
	4℃-3h-Re2	0.975355
	4℃-3h-Re3	1.16312
	4℃-9h-Re1	0.490276
	4℃-9h-Re2	0.514651
	4℃-9h-Re3	0.56201
	4℃-12h-Re1	0.531939
	4℃-12h-Re2	0.580486
	4℃-12h-Re3	0.499423
	4℃-24h-Re1	0.211589
	4℃-24h-Re2	0.192287
	4℃-24h-Re3	0.204239
	PEG-0h-Re1	1.02337
	PEG-0h-Re2	1.04633
	PEG-0h-Re3	0.933896
	PEG-1.5h-Re1	0.299577
	PEG-1.5h-Re2	0.256139
	PEG-1.5h-Re3	0.32019
	PEG-3h-Re1	0.340801
	PEG-3h-Re2	0.302079
	PEG-3h-Re3	0.345558
	PEG-9h-Re1	0.309569
	PEG-9h-Re2	0.33642
	PEG-9h-Re3	0.36636
	PEG-12h-Re1	0.342854
	PEG-12h-Re2	0.330487
	PEG-12h-Re3	0.362906
	PEG-24h-Re1	23.5339
	PEG-24h-Re2	21.3574
	PEG-24h-Re3	19.5171
	NaCl-0h-Re1	1.07848
	NaCl-0h-Re2	0.967276
	NaCl-0h-Re3	0.958599
	NaCl-1.5h-Re1	1.99677
	NaCl-1.5h-Re2	1.5896
	NaCl-1.5h-Re3	1.84506
	NaCl-3h-Re1	6.96762
	NaCl-3h-Re2	7.22334
	NaCl-3h-Re3	6.42487
	NaCl-9h-Re1	3.6731
	NaCl-9h-Re2	2.88586
	NaCl-9h-Re3	2.75108
	NaCl-12h-Re1	7.33095
	NaCl-12h-Re2	7.14533
	NaCl-12h-Re3	6.66221
	NaCl-24h-Re1	5.3579
	NaCl-24h-Re2	4.95082
	NaCl-24h-Re3	4.68376
SlDUF668-03	4℃-0h-Re1	1.0629
	4℃-0h-Re2	1.06585
	4℃-0h-Re3	1
	4℃-1.5h-Re1	0.484645
	4℃-1.5h-Re2	0.441964
	4℃-1.5h-Re3	0.456599
	4℃-3h-Re1	2.41329
	4℃-3h-Re2	2.84613
	4℃-3h-Re3	2.66106
	4℃-9h-Re1	1.91454
	4℃-9h-Re2	1.90924
	4℃-9h-Re3	1.89605
	4℃-12h-Re1	0.24429
	4℃-12h-Re2	0.266031
	4℃-12h-Re3	0.260737
	4℃-24h-Re1	0.24925
	4℃-24h-Re2	0.307289
	4℃-24h-Re3	0.290511
	PEG-0h-Re1	1.00394
	PEG-0h-Re2	0.934759
	PEG-0h-Re3	1.0656
	PEG-1.5h-Re1	1.1434
	PEG-1.5h-Re2	1.27751
	PEG-1.5h-Re3	1.13629
	PEG-3h-Re1	0.35168
	PEG-3h-Re2	0.367887
	PEG-3h-Re3	0.41764
	PEG-9h-Re1	0.404628
	PEG-9h-Re2	0.414851
	PEG-9h-Re3	0.393836
	PEG-12h-Re1	0.406972
	PEG-12h-Re2	0.392836
	PEG-12h-Re3	0.372936
	PEG-24h-Re1	5.12896
	PEG-24h-Re2	4.62248
	PEG-24h-Re3	4.16024
	NaCl-0h-Re1	1.16959
	NaCl-0h-Re2	1.11265
	NaCl-0h-Re3	1
	NaCl-1.5h-Re1	3.988
	NaCl-1.5h-Re2	3.7055
	NaCl-1.5h-Re3	3.39795
	NaCl-3h-Re1	2.29421
	NaCl-3h-Re2	1.90792
	NaCl-3h-Re3	1.83655
	NaCl-9h-Re1	0.932171
	NaCl-9h-Re2	0.879446
	NaCl-9h-Re3	1.01513
	NaCl-12h-Re1	2.75936
	NaCl-12h-Re2	2.91467
	NaCl-12h-Re3	2.94513
	NaCl-24h-Re1	2.52275
	NaCl-24h-Re2	2.29899
	NaCl-24h-Re3	2.46741
SlDUF668-04	4℃-0h-Re1	0.983048
	4℃-0h-Re2	1.04343
	4℃-0h-Re3	0.974905
	4℃-1.5h-Re1	0.00643282
	4℃-1.5h-Re2	0.00692806
	4℃-1.5h-Re3	0.00694248
	4℃-3h-Re1	0.0073536
	4℃-3h-Re2	0.00763406
	4℃-3h-Re3	0.00708836
	4℃-9h-Re1	0.0189455
	4℃-9h-Re2	0.0224056
	4℃-9h-Re3	0.0178368
	4℃-12h-Re1	0.121217
	4℃-12h-Re2	0.132463
	4℃-12h-Re3	0.134686
	4℃-24h-Re1	0.00324178
	4℃-24h-Re2	0.00296449
	4℃-24h-Re3	0.00303308
	PEG-0h-Re1	0.997923
	PEG-0h-Re2	1.07848
	PEG-0h-Re3	0.929161
	PEG-1.5h-Re1	0.669118
	PEG-1.5h-Re2	0.785854
	PEG-1.5h-Re3	0.605556
	PEG-3h-Re1	0.032834
	PEG-3h-Re2	0.0280342
	PEG-3h-Re3	0.0315839
	PEG-9h-Re1	0.0148884
	PEG-9h-Re2	0.0158139
	PEG-9h-Re3	0.0163489
	PEG-12h-Re1	0.122371
	PEG-12h-Re2	0.12899
	PEG-12h-Re3	0.105355
	PEG-24h-Re1	0.371818
	PEG-24h-Re2	0.373367
	PEG-24h-Re3	0.342617
	NaCl-0h-Re1	1.12039
	NaCl-0h-Re2	0.915734
	NaCl-0h-Re3	0.97468
	NaCl-1.5h-Re1	0.339622
	NaCl-1.5h-Re2	0.358737
	NaCl-1.5h-Re3	0.396117
	NaCl-3h-Re1	0.759611
	NaCl-3h-Re2	0.989885
	NaCl-3h-Re3	0.82264
	NaCl-9h-Re1	0.177513
	NaCl-9h-Re2	0.141807
	NaCl-9h-Re3	0.172181
	NaCl-12h-Re1	0.181747
	NaCl-12h-Re2	0.186986
	NaCl-12h-Re3	0.196963
	NaCl-24h-Re1	0.210564
	NaCl-24h-Re2	0.246786
	NaCl-24h-Re3	0.19043
SlDUF668-05	4℃-0h-Re1	0.95
	4℃-0h-Re2	1.0196
	4℃-0h-Re3	1.0324
	4℃-1.5h-Re1	0.421518
	4℃-1.5h-Re2	0.374404
	4℃-1.5h-Re3	0.400165
	4℃-3h-Re1	0.244629
	4℃-3h-Re2	0.253431
	4℃-3h-Re3	0.209158
	4℃-9h-Re1	0.180867
	4℃-9h-Re2	0.172062
	4℃-9h-Re3	0.157563
	4℃-12h-Re1	2.69384
	4℃-12h-Re2	2.39606
	4℃-12h-Re3	2.28258
	4℃-24h-Re1	0.0226084
	4℃-24h-Re2	0.0230834
	4℃-24h-Re3	0.0190509
	PEG-0h-Re1	0.951538
	PEG-0h-Re2	1.06683
	PEG-0h-Re3	0.985094
	PEG-1.5h-Re1	0.591179
	PEG-1.5h-Re2	0.469002
	PEG-1.5h-Re3	0.559289
	PEG-3h-Re1	0.0491613
	PEG-3h-Re2	0.0527629
	PEG-3h-Re3	0.060819
	PEG-9h-Re1	0.073133
	PEG-9h-Re2	0.0571409
	PEG-9h-Re3	0.0770889
	PEG-12h-Re1	0.310931
	PEG-12h-Re2	0.336497
	PEG-12h-Re3	0.287905
	PEG-24h-Re1	0.29937
	PEG-24h-Re2	0.269994
	PEG-24h-Re3	0.312299
	NaCl-0h-Re1	0.915311
	NaCl-0h-Re2	1.08172
	NaCl-0h-Re3	1.00998
	NaCl-1.5h-Re1	0.912565
	NaCl-1.5h-Re2	0.789494
	NaCl-1.5h-Re3	0.865137
	NaCl-3h-Re1	2.79013
	NaCl-3h-Re2	2.69136
	NaCl-3h-Re3	2.61232
	NaCl-9h-Re1	0.493116
	NaCl-9h-Re2	0.585199
	NaCl-9h-Re3	0.531448
	NaCl-12h-Re1	0.970634
	NaCl-12h-Re2	0.802737
	NaCl-12h-Re3	0.98214
	NaCl-24h-Re1	0.410181
	NaCl-24h-Re2	0.41132
	NaCl-24h-Re3	0.439926
SlDUF668-06	4℃-0h-Re1	1.08247
	4℃-0h-Re2	1.0044
	4℃-0h-Re3	0.919763
	4℃-1.5h-Re1	0.155933
	4℃-1.5h-Re2	0.148445
	4℃-1.5h-Re3	0.180116
	4℃-3h-Re1	0.0610866
	4℃-3h-Re2	0.0750502
	4℃-3h-Re3	0.071199
	4℃-9h-Re1	0.191356
	4℃-9h-Re2	0.209255
	4℃-9h-Re3	0.175353
	4℃-12h-Re1	0.103713
	4℃-12h-Re2	0.108945
	4℃-12h-Re3	0.116118
	4℃-24h-Re1	0.178789
	4℃-24h-Re2	0.173419
	4℃-24h-Re3	0.202267
	PEG-0h-Re1	0.94737
	PEG-0h-Re2	1.01537
	PEG-0h-Re3	1.03958
	PEG-1.5h-Re1	1.17229
	PEG-1.5h-Re2	1.19527
	PEG-1.5h-Re3	1.12376
	PEG-3h-Re1	0.17115
	PEG-3h-Re2	0.175962
	PEG-3h-Re3	0.178294
	PEG-9h-Re1	0.0403954
	PEG-9h-Re2	0.0481718
	PEG-9h-Re3	0.0508127
	PEG-12h-Re1	0.126686
	PEG-12h-Re2	0.114493
	PEG-12h-Re3	0.103617
	PEG-24h-Re1	6.35107
	PEG-24h-Re2	7.87347
	PEG-24h-Re3	7.44876
	NaCl-0h-Re1	1.05555
	NaCl-0h-Re2	1.00417
	NaCl-0h-Re3	0.943438
	NaCl-1.5h-Re1	0.753667
	NaCl-1.5h-Re2	0.682074
	NaCl-1.5h-Re3	0.820742
	NaCl-3h-Re1	0.980326
	NaCl-3h-Re2	0.860551
	NaCl-3h-Re3	0.9071
	NaCl-9h-Re1	0.525586
	NaCl-9h-Re2	0.622006
	NaCl-9h-Re3	0.663423
	NaCl-12h-Re1	0.528875
	NaCl-12h-Re2	0.613442
	NaCl-12h-Re3	0.585199
	NaCl-24h-Re1	0.561101
	NaCl-24h-Re2	0.535639
	NaCl-24h-Re3	0.621288
SlDUF668-07	4℃-0h-Re1	1.0037
	4℃-0h-Re2	0.962817
	4℃-0h-Re3	1.03479
	4℃-1.5h-Re1	0.35388
	4℃-1.5h-Re2	0.366868
	4℃-1.5h-Re3	0.335488
	4℃-3h-Re1	0.203345
	4℃-3h-Re2	0.182884
	4℃-3h-Re3	0.228458
	4℃-9h-Re1	0.718304
	4℃-9h-Re2	0.686184
	4℃-9h-Re3	0.624021
	4℃-12h-Re1	0.8215
	4℃-12h-Re2	0.96549
	4℃-12h-Re3	1.02337
	4℃-24h-Re1	1.56302
	4℃-24h-Re2	2.07244
	4℃-24h-Re3	1.76704
	PEG-0h-Re1	1.05751
	PEG-0h-Re2	1.01373
	PEG-0h-Re3	0.932817
	PEG-1.5h-Re1	0.0833312
	PEG-1.5h-Re2	0.0707562
	PEG-1.5h-Re3	0.0785089
	PEG-3h-Re1	0.0920142
	PEG-3h-Re2	0.0997182
	PEG-3h-Re3	0.0850821
	PEG-9h-Re1	0.0557069
	PEG-9h-Re2	0.0523742
	PEG-9h-Re3	0.058517
	PEG-12h-Re1	6.73806
	PEG-12h-Re2	6.60397
	PEG-12h-Re3	6.96601
	PEG-24h-Re1	1157.4
	PEG-24h-Re2	1222.54
	PEG-24h-Re3	1265.65
	NaCl-0h-Re1	0.937788
	NaCl-0h-Re2	0.968171
	NaCl-0h-Re3	1.1014
	NaCl-1.5h-Re1	0.119742
	NaCl-1.5h-Re2	0.126921
	NaCl-1.5h-Re3	0.123279
	NaCl-3h-Re1	0.36942
	NaCl-3h-Re2	0.347078
	NaCl-3h-Re3	0.443908
	NaCl-9h-Re1	0.0684092
	NaCl-9h-Re2	0.0712648
	NaCl-9h-Re3	0.0767512
	NaCl-12h-Re1	0.191003
	NaCl-12h-Re2	0.212519
	NaCl-12h-Re3	0.207426
	NaCl-24h-Re1	0.201987
	NaCl-24h-Re2	0.194028
	NaCl-24h-Re3	0.16786
SlDUF668-08	4℃-0h-Re1	0.989199
	4℃-0h-Re2	0.947589
	4℃-0h-Re3	1.06683
	4℃-1.5h-Re1	0.600957
	4℃-1.5h-Re2	0.638312
	4℃-1.5h-Re3	0.666803
	4℃-3h-Re1	0.302918
	4℃-3h-Re2	0.296684
	4℃-3h-Re3	0.330564
	4℃-9h-Re1	0.57025
	4℃-9h-Re2	0.599016
	4℃-9h-Re3	0.599016
	4℃-12h-Re1	0.0213789
	4℃-12h-Re2	0.0189762
	4℃-12h-Re3	0.024918
	4℃-24h-Re1	0.421518
	4℃-24h-Re2	0.473576
	4℃-24h-Re3	0.479854
	PEG-0h-Re1	0.935191
	PEG-0h-Re2	1.00023
	PEG-0h-Re3	1.06905
	PEG-1.5h-Re1	0.424156
	PEG-1.5h-Re2	0.417447
	PEG-1.5h-Re3	0.372075
	PEG-3h-Re1	0.000622632
	PEG-3h-Re2	0.000684656
	PEG-3h-Re3	0.000649522
	PEG-9h-Re1	0.00880578
	PEG-9h-Re2	0.00867252
	PEG-9h-Re3	0.00830195
	PEG-12h-Re1	0.15209
	PEG-12h-Re2	0.155286
	PEG-12h-Re3	0.141316
	PEG-24h-Re1	1.3912
	PEG-24h-Re2	1.58813
	PEG-24h-Re3	1.51607
	NaCl-0h-Re1	1.04439
	NaCl-0h-Re2	1.00603
	NaCl-0h-Re3	0.951758
	NaCl-1.5h-Re1	0.128277
	NaCl-1.5h-Re2	0.135122
	NaCl-1.5h-Re3	0.118777
	NaCl-3h-Re1	0.32722
	NaCl-3h-Re2	0.407348
	NaCl-3h-Re3	0.343727
	NaCl-9h-Re1	0.175393
	NaCl-9h-Re2	0.194207
	NaCl-9h-Re3	0.208002
	NaCl-12h-Re1	0.0146394
	NaCl-12h-Re2	0.016945
	NaCl-12h-Re3	0.0177259
	NaCl-24h-Re1	0.023563
	NaCl-24h-Re2	0.0220003
	NaCl-24h-Re3	0.0206125
SlDUF668-09	4℃-0h-Re1	1.11008
	4℃-0h-Re2	0.903544
	4℃-0h-Re3	0.997001
	4℃-1.5h-Re1	0.227457
	4℃-1.5h-Re2	0.244629
	4℃-1.5h-Re3	0.27427
	4℃-3h-Re1	0.28744
	4℃-3h-Re2	0.269496
	4℃-3h-Re3	0.315855
	4℃-9h-Re1	0.225469
	4℃-9h-Re2	0.286578
	4℃-9h-Re3	0.25437
	4℃-12h-Re1	0.104507
	4℃-12h-Re2	0.102783
	4℃-12h-Re3	0.113021
	4℃-24h-Re1	0.287972
	4℃-24h-Re2	0.26334
	4℃-24h-Re3	0.165741
	PEG-0h-Re1	1.02788
	PEG-0h-Re2	0.99562
	PEG-0h-Re3	0.97716
	PEG-1.5h-Re1	1.0274
	PEG-1.5h-Re2	1.14393
	PEG-1.5h-Re3	1.16959
	PEG-3h-Re1	0.0730486
	PEG-3h-Re2	0.0650188
	PEG-3h-Re3	0.0710511
	PEG-9h-Re1	0.0939476
	PEG-9h-Re2	0.115743
	PEG-9h-Re3	0.123108
	PEG-12h-Re1	0.765956
	PEG-12h-Re2	0.658536
	PEG-12h-Re3	0.777726
	PEG-24h-Re1	8.1098
	PEG-24h-Re2	6.89078
	PEG-24h-Re3	7.0845
	NaCl-0h-Re1	0.964375
	NaCl-0h-Re2	1.02078
	NaCl-0h-Re3	1.01584
	NaCl-1.5h-Re1	0.50921
	NaCl-1.5h-Re2	0.491524
	NaCl-1.5h-Re3	0.426712
	NaCl-3h-Re1	0.711696
	NaCl-3h-Re2	0.867739
	NaCl-3h-Re3	0.702872
	NaCl-9h-Re1	0.265847
	NaCl-9h-Re2	0.264193
	NaCl-9h-Re3	0.242939
	NaCl-12h-Re1	0.125173
	NaCl-12h-Re2	0.153042
	NaCl-12h-Re3	0.134344
	NaCl-24h-Re1	0.106925
	NaCl-24h-Re2	0.0943827
	NaCl-24h-Re3	0.102073
