# Supplementary material for: Genome-wide identification, characterization and expression analysis of the DUF668 gene family in tomato
Source: PeerJ. 2024 Jun 18;12:e17537. doi: 10.7717/peerj.17537 (PMC11192028; doi:10.7717/peerj.17537)
Supplement: Supplemental Information 9 [file peerj-12-17537-s009.xls]

## Sheet: Sheet1
ITEM TO CHECK	IMPORTANCE	CHECKLIST
EXPERIMENTAL DESIGN
Definition of experimental and control groups	E	Page 3,lines 94-104
Number within each group	E	Page 3,lines 107
Assay carried out by core lab or investigator's lab?	D
Acknowledgement of authors' contributions	D
SAMPLE
Description	E	Page 3,lines 94-104
Volume/mass of sample processed	D
Microdissection or macrodissection	E	macrodissection, Page 3,lines 94-104
Processing procedure	E	Page 3,lines 94-104
If frozen - how and how quickly?	E	Page 3,lines 105
If fixed - with what, how quickly?	E	Page 3,lines 94-104
Sample storage conditions and duration (especially for FFPE samples)	E	Page 3,lines 105
NUCLEIC ACID EXTRACTION
Procedure and/or instrumentation	E	Page 5,lines 157
Name of kit and details of any modifications	E	Page 5,lines 157-162
Source of additional reagents used	D
Details of DNase or RNAse treatment	E	Page 5,lines 157-158
Contamination assessment (DNA or RNA)	E	Page 5,lines 157-158
Nucleic acid quantification	E	Page 5,lines 158
Instrument and method	E	Page 5,lines 158
Purity (A260/A280)	D
Yield	D
RNA integrity method/instrument	E	Page 5,lines 157-158
RIN/RQI or Cq of 3' and 5' transcripts	E	Page 5,lines 157-158
Electrophoresis traces	D
Inhibition testing (Cq dilutions, spike or other)	E	Page 5,lines 157-161
REVERSE TRANSCRIPTION
Complete reaction conditions	E	Page 5,lines 159-161
Amount of RNA and reaction volume	E	Page 5,lines 160
Priming oligonucleotide (if using GSP) and concentration	E	Page 5,lines 159-161
Reverse transcriptase and concentration	E	Page 5,lines 159-161
Temperature and time	E	Page 5,lines 159-161
Manufacturer of reagents and catalogue numbers	D
Cqs with and without RT	D*
Storage conditions of cDNA	D
qPCR TARGET INFORMATION
If multiplex, efficiency and LOD of each assay.	E	Page 5,lines 165-166
Sequence accession number	E	Page 5,lines 159-161
Location of amplicon	D
Amplicon length	E	Page 5,lines 159-161
In silico specificity screen (BLAST, etc)	E	Page 5,lines 159-161
Pseudogenes, retropseudogenes or other homologs?	D
Sequence alignment	D
Secondary structure analysis of amplicon	D
Location of each primer by exon or intron (if applicable)	E	Page 5,lines 159-161
What splice variants are targeted?	E	Page 5,lines 159-161
qPCR OLIGONUCLEOTIDES
Primer sequences	E	Page 5,lines 159-161
RTPrimerDB Identification Number	D
Probe sequences	D**
Location and identity of any modifications	E	Page 5,lines 159-161
Manufacturer of oligonucleotides	D
Purification method	D
qPCR PROTOCOL		Page 5,lines 159-161
Complete reaction conditions	E	Page 5,lines 161-164
Reaction volume and amount of cDNA/DNA	E	Page 5,lines 159-161
Primer, (probe), Mg++ and dNTP concentrations	E	Page 5,lines 159-161
Polymerase identity and concentration	E	Page 5,lines 159-161
Buffer/kit identity and manufacturer	E	Page 5,lines 159-161
Exact chemical constitution of the buffer	D
Additives (SYBR Green I, DMSO, etc.)	E	Page 5,lines 159-161
Manufacturer of plates/tubes and catalog number	D
Complete thermocycling parameters	E	Page 5,lines 159-161
Reaction setup (manual/robotic)	D
Manufacturer of qPCR instrument	E	Page 5,lines 159-161
qPCR VALIDATION
Evidence of optimisation (from gradients)	D
Specificity (gel, sequence, melt, or digest)	E	Page 5,lines 159-161
For SYBR Green I, Cq of the NTC	E	Page 5,lines 159-161
Standard curves with slope and y-intercept	E	Page 5,lines 159-161
PCR efficiency calculated from slope	E	Page 5,lines 159-161
Confidence interval for PCR efficiency or standard error	D
r2 of standard curve	E	Page 5,lines 159-161
Linear dynamic range	E	Page 5,lines 159-161
Cq variation at lower limit	E
Confidence intervals throughout range	D
Evidence for limit of detection	E	Page 5,lines 159-161
If multiplex, efficiency and LOD of each assay.	E	Page 5,lines 159-161
DATA ANALYSIS
qPCR analysis program (source, version)	E	Page 5,lines 159-161
Cq method determination	E	Page 5,lines 159-161
Outlier identification and disposition	E	Page 5,lines 159-161
Results of NTCs	E	Page 5,lines 159-161
Justification of number and choice of reference genes	E	Page 5,lines 162-163
Description of normalisation method	E	Page 5,lines 168-169
Number and concordance of biological replicates	D
Number and stage (RT or qPCR) of technical replicates	E	Page 5,lines 167-168
Repeatability (intra-assay variation)	E	Page 5,lines 166-168
Reproducibility (inter-assay variation, %CV)	D
Power analysis	D
Statistical methods for result significance	E	Page 5,lines 170-171
Software (source, version)	E	Page 5,lines 170-171
Cq or raw data submission using RDML	D
Table 1. MIQE checklist for authors, reviewers and editors. All essential information (E) must be submitted with the manuscript. Desirable
information (D) should be submitted if available. If using primers obtained from RTPrimerDB, information on qPCR target, oligonucleotides,
protocols and validation is available from that source.
*: Assessing the absence of DNA using a no RT assay is essential when first extracting RNA. Once the sample has been validated as
RDNA-free, inclusion of a no-RT control is desirable, but no longer essential.
**: Disclosure of the probe sequence is highly desirable and strongly encouraged. However, since not all commercial pre-designed assay
vendors provide this information, it cannot be an essential requirement. Use of such assays is advised against.
