# Supplementary material for: Genome-wide identification, characterization and expression analysis of the DUF668 gene family in tomato
Source: PeerJ. 2024 Jun 18;12:e17537. doi: 10.7717/peerj.17537 (PMC11192028; doi:10.7717/peerj.17537)
Supplement: Table S1 [file peerj-12-17537-s002.xls]

## Sheet: Sheet1
Supplementary Table S1. Primers used in qRT-PCR analysis of SlDUF668s.
Gene name	Forward primer (5’-3’)	Reverse primer (5’-3’)
SlDUF668-01	TGATGAACAATCCTCCCCCTAT	GATCTTAATGATGATCGAACGCTAT
SlDUF668-02	AAGCAATGGATTTGTTTCTGGT	AGCTGCACACTTTCTGAAGGTAG
SlDUF668-03	ATTGCCTCCTTCCATAAAAACG	GCCCACTCTCCAACCCATC
SlDUF668-04	TCAAGGGTGCCAATCTTATGTAT	ATTCCAACTTCTCAAAGTAACGGT
SlDUF668-05	GTGGCACTGATTCACCTGTTCT	AGTATGATGATGTTCGCGTACTTG
SlDUF668-06	GGTCCCCTGGTAGTATCCGTTT	ATAGATCATCCCTCCCCTCATC
SlDUF668-07	CGCAGCATTGGAGAGTTTAGC	CGCAACGATAGTGAAGGAAGA
SlDUF668-08	CTGGGGAGGTCAACAACAAAAT	AAAACCTGAATGAAATCCGTGT
SlDUF668-09	GCCACCAAGCATAAAGTCAGC	GCCCATTCTCCAACCCATC
SlEF1a	TGTCCCTATTTACGAGGGTTATGC	AGTTAAATCACGACCAGCAAGAT
