# Supplementary material for: Genome-wide identification, characterization and expression analysis of the DUF668 gene family in tomato
Source: PeerJ. 2024 Jun 18;12:e17537. doi: 10.7717/peerj.17537 (PMC11192028; doi:10.7717/peerj.17537)
Supplement: Table S2 [file peerj-12-17537-s003.xlsx]

## Sheet: 全蛋白序列
Supplementary Table S2. DUF668 protein sequences used to construct the phylogenetic tree.
>SlDUF668-01
MALETWLNKVKKTIAQSFVTVRSAGAPRAKTAVIKKSSVGVLAFEISGLMSKLLHLWQFLSEKNMMRIRNESICTEGVRKIVSNDDAFLLGLACAEIVENLRLVAKSLSRMSKRCEDSHLRSFDRLFTEFANTGRDPYNWVLSLKDMELKIKKMDQFVTTTALLHRQMDELSVLENSLKKASNSNTNSHFNDSDISIKEQKILELRQKYLWQKQEVKYLKERSLWCRSFDTVASLLARSIFTTLARIKLVFGINHGYPNSLPRSLSASATVYPSENHNTCNFVSGPLMNNPPPILKVSDHEFFESNTKLLKPPTSTLGAAALALHYANLIIVMEKMIRSPQLVGVDARDDLYSMLPNSVRSSLRSRLKGVGFSASDPVLAGEWKDALQKILGWLSPLAH…
>SlDUF668-02
MAQSQQKSYVDVIRRDLDFGMDDWVYLKILPMKGLMRFGKKSKLDPRYVYPYKILRHTGNVAHKLDLPDDLALVHPILNVSLFKKCVGDPIYIISLESLGIKESLSYEQVMLVFSASRFCQTPKSDNKNTQQIINEDEFYDGIPRFSSQKSKSTRVPKVAEVSSRLGRAGSAGFIRTVQALDTIGSSLTNLNLSNGFVSGATIKGNELSILSFEVANTIVKGSNLMHSLSRRSIRQLKDVVLPSESVQLLVSNDMDELLSIVADDKRKELQVFAGEVVRFGSQCKDPQWHNLDRFFEKYRREPTPQRQLKEEAELMMEQLMTLVQYTAELYHELHTLDKIEQDYQHKHLENGKSNASQKGNGLIILAAELKSQKRIVRNLKKKSLWSRSLEEVMDKLVD…
>SlDUF668-03
MGGVCTGGTARNRVEIHHESPPGSSKKGNSVESIGKQKKAESFSYPDVGAFRGTPNLYDSGELYMSISRELKPSTPARTGVNKAPSSFLGKASIVGLEKAVEVLDTLGSSMTNLNSGGFMSGTTSRGNKISILAYEVANTITKGANLLQSLSKENVEYLKKEILPSKGVQQLVSTNMKELLTIAAADKREEFDIFSREVIRFGDMCKDPQWHNLNRYFSRLDSDTLTHKQLRSEAELMMQELSTLAQHTSELYHEMHALDRFEQDYRRKLEELDSLNLPRKGEGLMMLQSELKHQRKIARSLKKKSLWAKGLEEVVEKLVDIVTYIHQAIVEAFGDNGLTSAVKEPVKKQERLGVAGLALHYANLVTQIDNIASRPTALPPNMRDGLYNGLPPSIKTAL…
>SlDUF668-04
MGGLCSRRATSENTTGRSIPHVNGHFNYGAGTVYQSHRLPPQANNDSMQSPLGESTENQPSEPVFSFPELNAASHGVEMDAINDGIPRLSRALSNKTRPTRSKQVAMAKVSEVSSLLGRAGTAGLGKAVDVLDTLGSSMTNLNLSGGFASSMATKGNKISILSFEVANTIVKGANLMYSLSNENIKHLKEVVLPSEGVQLLISKDMDELFRIAAADKRDELKIFSCEVVRFGNSCKDPQWHNLDRYFEKLESELTPHKQLKEEAETVMLHLMTLVQYTAELYHELHALDRIEQDCRRKAQEEDTSNATQKGDSLAILRAELKSQKKHVKSLKKKSLWSKILEEVMEKLVDIVHFLHLEIHAAFGNSDGDRPIKNNHQRLGSAGLALHYANIITQIDTLV…
>SlDUF668-05
MMGVETVTESFFNLWRTSRKSSTSEPERKNVIGILAFEIATLMSKVVNLWQCLSERRIDKLREEISSSLGIQKLVAEDDKYLMDLAIAEIIDNLGSLTKSLATLGKRCADPVYHNLERIFEDPVEIELNGCAWRYKLKKMERKVKKMERFVAATTQLYQELEVLAELEQTLRRMQAGASSGQMKLLEFRQKVIWQREEVKNLREMSPWVRTYDYTVRLLLRSIFTIIMRIKYLFGTNQSEVSGGSNHFEGIDNGYLDRSRSISALTLSSVYPSENSTSESYLGSIGRSFSSLGLSGNKDRPTNRKSLARQSSVFCGKPPQPRSRRFANVGSFKGCMNSGTDSPVLESCMPSNSDVSKSDDSFQKDTDKFEDTNPVPASSNGVILTKGSLFNFKRKLLIV…
>SlDUF668-06
MVAEPWCLRMGSQVSTNVKKHSLLIENSKRLSMKKQTQQEKLFIGILSFEVANMMSKIIHLHKSLTDSEILKLKNEIFKSVGVKALVSDDEDKLLELVLVEKLDDLNRVASVVSRLGKKCTISALQGFQHVYGDVISGVIDVKDLGFLVKDMDGMVRKMERYVNSTASLYCEMAVLNELEVATKKFQQNQHEESRKAFEQKLAWQKQDVRHLEDVSLWNQTYDKVVELLARTVCTVYARISTVFGNNVLVKRDLLGNRGFNEKSGSIVADSKSEVMDADFKKPVLRNNNGSYRSGSIEGGVSGKRSMNHSTQTKGGRNEGSLFGTENFNFACGMGPGRLFMECLSLSSASKMDFDNDVGTDDRSSQISGCCSVSSGMKRSPGSIRFSGDTRQLKSCVSD…
>SlDUF668-07
MVGFAKMGWRSSDSSKTGDDMNKMGILSFETAKIMSRLLCLYKSLSESEISNLKTEMNSRGVSYLNSKDEGFLLSLACAERLEDLDKAAAAVSRLGHKCTDFGLNRFDLVYTDLKLGIIDFGKLEYGSKDIEKRVFKMEKLINATSGLYAALESLAELEVSERKMKQWTERKGSGRLQKVNLDVFHQKLEQQRKQVRQFRENSLWNQTFDKSVGHMARIVCIIYARICIVFGPYIPILPSLSLRNMRSSQQKEILKVQPENCLIEPIREQIISRSGPIPTTSKPTLVRFYSRKSIFFLCEDEGFGVDKLAKNNRVFHAAGPLTVGGAGLALRYANVITLVEKYSNPSESVDLSSRENLYQMLPVNLKKTVRSKLSKNLKCMDEDESLAEGWRDALKQIM…
>SlDUF668-08
MVAESWFRNFWKNSKKHEGGGHQKVLVGVLAFEVASLMSKLVHVWQSLSDKQVARLRDEIMNSVGIKKLISDDDSYTARLICTELVENLGHVATAVSRLAKKCNDPFLKSFEQAFNDLLKVGADPYGWQLSWKKMDKKIKKMERFIVINANLYQEMENLSDLEQTLRRLKGNDDADSITLVEYEKKLAWKKQEVKHLKDVSIWNRTYDYIVRLLARSLFSIFSRIGHVFGVDPVVDERAKASRDLDSDQIHRSYSVAYAQSSVHPSESSLSRFSSEPVESILAKSGPISSTRNIHSSYSGPLKSSTSTASPIPGRHSSAGFYSGPLGRSTTKSGPLPLFNKSGMKWWKSRDRSGNLNGKGSNLKHARPTSGPLKGCMMVGNGSPVSNCHLDPHGFHSGF…
>SlDUF668-09
MGGLCSRRANADSTTDHGIPHGNGHLSYGAGTVYQSRGLPIQLSSDPMPPAGESQQLTEPTLSYPEMNDISLGIPMDDVDDGIPILSRVLSNKSISARSKQVAIAKVSEMSSLLGRAGTAGLGKAVNVLDTLGSSMTNLNLSSGFVSNMATKGNKISILAFEVANTIVKAANLIHSLSEENVKHLKEVVLLSEGVQLLITKDMDELLRIAAADKRDELKIFSGEVVRFGNRCKDPQWHNLERYFEKLESELTPHEHLKEEAEALMVQLMISVQYTAELYHEFHALDRFEQDYRRKVQEEDTSSATQRGDTIAILRADLKSQRKHVKNLKKKSLWSKILEEVTEKLVDIVHYLHLEIHAAFGSADGEISMKNNNQRLGSAGLALHYANIITQIDTIVARP…
>GhDUF668-01
MVTESWFRNLWKIPRRQDGISEKVEIGVLAFEVASLMSKLVHLWQCLSDKQVFRLREEITNSVGIKKLVSEDEEYIGRLICAEMVENVTHVAKSVARLVKKCNDPGLKSFELAFTELIHNGVDPYGWIFSLKKMERKVKKMERFISVNATLYQEMELLADLEQTLKRMKSGDSAQESWLEFHKKVMLKQHEVKSLRASSLWNKTYDYTIRLLARSIFTIFSRIKHVFGFEHKVDVGDSKVMDSDFMHRSQSVSALMHASVRPTENTSLPRFSSGPLGIFSTKSGPIPAPDKTNYFHSGPLVGSTPKSGSISGKNRNFNFHSGPLGRTAGRSGPLFGMDKISKIWQTNNHSAAVSGKKPHLRSNRLTQVGPFKGCMVDSGAVRNCYISSNGIHSGIPNGT…
>GhDUF668-02
MGREMVESWFGGSWWNPRKSASESTDKVMLGILAFEVAGLMSKVVNLWHSLDDREIFRLREEIANSIGIQRLVSDDESYIMDLALNEVIENFGHLATYVARLGKKCTDPIYHHFEAFVNDPLLNNMEWFGWEYRWKKMEKKMKKMERFVAVTMQLTQELEVLAELEQTLRRMQRNPELDRVKLLEFQQKVILQRQEVKNLREMSPWVRTYDYIVRFLLRSLLTILERIKNVFGTNQMVPVERNDDFESVNSDYLSRSHSFSTVIPSSVYPSDHNLCGFSSGPLGRSFSKSMSITGKHRTNSKHLHSHYHSTALHGKQPHSRTKRAGQSAFGPFKGCMLAGSISPVLDSYKPIGTISTRFSGAYPKNIDNLKMEPLSRSYNIYSKLSIFNTKRLLNAPIS…
>GhDUF668-03
MAWRPAGVNKASNKSHVSRHTKSSSSSLPLSSSSSSSCSPTLQILAFETAKCMVRLVALYKSLSDDQFHRLRNGIMKSPGVVTLNPDDETYLLSLACEEMLENLDQAAAIVSRLGKKCIDVELNRFDIAYHNMKQGIIDARTLDFNTEHVVKAIDQMEKYVCSTSVLYASLVGVDEMEISKRKKWRRNSGSKIDYFNEEISSRRKQVLHFRKISLWNQTFDKIVALMAQIVAVIFVRICTVFEPFVSSLPCITTKNRNFNRLHYNSNPKSPKGVTFRLSSITKIDKFITKIRYMDVKTEKNQMLVQSAPENTVGAAGLALRYANVIIMAEAYFYSSQMITNDARGYMFEMLPMNLKQMLRGKLKSHWHKDAEAREGQQGVAEGWKAALEEIFEWLAPVA…
>GhDUF668-04
MVAETWIHKLGSQVSSNLKHAFLLDPSSKKKNTQNNPTSKKHETVGILSFEVANVMSKTIHLHKSLSEPEVSKLKFEILNSQGISNLISSDENYLLSLVLAEKLDELNKVANVVSRLGKKCNEPALTGFEHVYGDVINGVIDVRELGFLVKDMDGMVKKMESYVNSTANLYNEMEVLNELEQGSKKFQANPHEESKRAFEQKLIWQKQDVRHLKNVSLWNQTFDKVVELLVRTVCTVFARILLVFGESLRKDSEFGRVNGGFRDQDHVVVSRYLKRVLSKSSSVGSGQPGNVTEKQGMSLKHRGIDSRKGEFGLFRVEDFGFACGTSPGRFFTDCLSLNRSVSRYGDSGNDDGNVGCDDRSSQISGCCSVANDGPKRERRNSSPFLQSQCSVLLNENQR…
>GhDUF668-05
MGGLCSRRSTVDNAPVGGFPHVNGHFARGSGLVFQTRQLPAKISTNSAPPAEDSADNAGMESREPFSFPEISTVRYGMNPADIDDGIPRLSRVLSNKSRSTKSKQAAVAKVTEVGSLLGRAGTAGFGKAVDVLDTLGSSMTNLNLGSGFTSGVTTKGNKISILSFEVANTIVKGANLMQSLSKENIRHLKEVVLKSEGVQNLISRDMDELLRIAAADKREELKIFSGEVVRFGNRCKDPQWHNLDRYFEKLGSELTFEKQLKEEAETIMQQLMTYVHYTAELYHELHALDRFEQDYRRKLQEEDNSNPAQRGDSLAILRAELKSQNKHVKNLKKKSLWSRILEEVMEKLVDIVHFLHLEIHEAFGAADGDKPVKGSVSSHKKLGTAGLALHYANIITQI…
>GhDUF668-06
MTMKELTSLAQHTSELYHELNVLDRFEQEYRLKSEEVEALNLPKRGENLMLLQSELKQQRKFVRSLKKKSLWSRTLEEIMEKLVDIVTYMHQAIFEALGETASSVKKETRENSQKLGVCGLALHYANVIHQIDNIAARPASLPPNIRDTLYHGLPPTVKKALRSRLQSIDTKEERSISQVKDEMEKTLQWLVPVATNTTKAHQGFGWVGEWASTGNEFGRSAAVNIALTGLQTLYHADKAKTDAYVLELVALLHHLISLVKQRDHGSKPQTFRSPFHSKMQRQFLSLNSGTKPRKVELSEQDRKLLSKVSGRRLVPGISKSQEFPLGKNKRIKVWALSRSAGNSPDRARKSCKHSKTNILDVMDGLDLAT
>GhDUF668-07
MAWPTAETEQVDKVSHGCTMFRHEKPGSPTLQILAFETARNMSRLVALYKSLTDEEFLKLRNGPMRSPGVAFLNSTDETYLLSLVCQEKLEDLNQIASIVSRLAKNCNGEELNKFETAFRNMKQGAVDVRNLDFNSRHVRKIIEKMEEYASATSLLHSSLVALNDLESSEKKIQRLKANDCPEIPSDKTNLDLYNDKISFQRKQVRYFRQVSLWSKTFDKCVGLMARIVCTVYARICVVFGPFVPGLVCTMFTITTKNYFRRLQVSRSKAFHMKVYPEAEYCLFVKEENHMRKASKSGHSRFKRGPTTRFPSSELSPEAKGLGFLLSGVTATKNNVEVNTRRNQRLIQSAPANSVGAAGLALRYANLITMAETYFYSTAIITDDARQLMFEMLPVHMKR…
>GhDUF668-08
MGGVCSSGTKELNTKLEQKTTTGFSGKLKSKRSFGKQKGNSDSHSNANGSGSDKARQWDDSGDLGLQISRELKSSTPARIAFSKGSQRNSYLGKAGIVGLEKAVDVLDTVGSSMSNFNAGSGFVTGLASRGHRVSILAFEVANTIAKGASLLQSLSEENIQFLKKEVLQSEGVQKLVSTNMNELQSIAAADKRDELDIFSREVIRFGDLCKDPQWHNLGRFFSKLDVDNSLHKQARADAEQTMQELTSLAQYTSELYHELNDLGRFELEVKRKLEEAESLNLPKRGQGLMILQSELKQQRKLVKSLKKKSLWSRTLEEVVEKFVDIVTYMHQAISDAFGEPASVTKETTENPQSLGVAGLALHYANVIHQIDNIAARPAYLPPNIRDTLYRGLPPSVKI…
>GhDUF668-09
MGGLCSRRSTVDNAPSGGFPHVNGHIGQRTGLVFQTRELPAKINAKSNPPPAEDNADKVSGEPFSFPEISTAPYGTSADDINDGIPRLSRVLSDKSRSTKSKQVTAAKVSEVGSLLGRAGTAGLGKAVEVLDTLGSSMTNLNLSSGFTSGVTTKGNKIAILAFEVANTIVKGANLMQSLSKENIRHLKEVVLSSEGVQNLISRDMDELLRIAAADKREELKVFSGEVVRFGNRCKDPQWHNLDRYFEKLGSELTPEKQLKDEAEAIMQQLMSYVQYTAELYHELHALDRFEQDYRRKLQEEDNSTAVQRGDSLAILKAELKSQKKHVRSLKKKSLWSRILEEVMEKLVDVVHFLHLDIHEAFGSAGGDKPIKASVSSHKKLGSAGLALHYANIITQIDT…
>GhDUF668-10
MVAESWFRSFWKIPRRHEGGSERVEIGVLAFEVASLMSKLVHLWRRLSDKQVSRLREEIMTCVGIKKLVSEDEGYIGHLICVEMIETVTHVAKSVARLAKKCSDPGLKSFELAFTELVQIGADPYCWTFSLKKMDKKVKKMERYISVNATLYQEMEMLLDLEQTLRRMKASGAEPENLLEFQKKVMWKQHEVKNLREMSLWSRTYDYTIRLTTRSIFTVFVSIKHVFGIEQNVDDGDLRAASINRCQSVSTLMQSSVHRTDNTSLTRFSSGPFGMFSTKSGPISKPNKTNYFHSGPLGDSTTKSGSLARKNGNFNFHLGPLERSTAKSGQLLGMDKISKKIWQTNNHPSAANGKKPHLKSNRLTQVGPFKGCIIDADDAIHSGILSGIKAGNLNPPEGN…
>GhDUF668-11
MGGICSRSGIRDDGVGNAYGGGDFNNNYQTKAVPENSLMNPPQVTEIMEKRIEEPTDDFYDGIPRFTRGMSQKSRSVRSTQAAVAKVSEVGSRLGKAGSVGLGKAVEVLDTLGSSMTSLNPNAGFASGVATKGNELSILAFEVANTIVKGSNLMQSLSRRNVRHLKEVVLATNGVQNLISKDMDELLRIVAVDKREELKIFSGEVVRFGNRSKDRQWHSLERYFEKISRELSPQKQLKEEAELLVEQLMISVQYTAELYQELQILDKFEQDYLRKRQEEDNSAGTQKGDSLAILKADLKSQRKQVRNLKKKSLWSRSLEEVMEKLVDIVHYLILEIHCAFGSNEYQKSPEGSESGHQRLGPAGLALHYANIIMQVDTLVARSSSIPANTREALYQNLPP…
>GhDUF668-12
MALETWLIKLKKTISNTLDTARSSNHKANVGVLSFEIAGHMSKLLQLWNCLSDTTIIRLRDESLSLEGVHKIVSNDESFLLGLACAEMAENIRVVAKSISRISKRCQDSDLQGFGGWFDEFANSGHDRHGWVLSSKDMEAKRKKMDKYVTITVTLYKEMEELSTIENCLRKCKEYKPSSIKEQKIVDLQTKLFWQRQEVKYLKERCLWNKSFDMVVSILVRSIFTILARLKLVFFGFEFGYPSCLPRSLSASATVHPTQNPDTFHFVSGPLKTSSKPVSFFESNSKLLKPPSSTLGAAALALHYANLIIIMEKMIKSPQLVGIDARDDLYSMLPSSISSCLRGRLKGRGLSSASDPVLAGEWRTAVRSILGWLSPLAHNTIKWQSERSFEHQNLLPKTN…
>GhDUF668-13
MRGGEMVAESWFGGSRLNSRNNSNLDITGKMLGILVFEVASLMSKVVNLWHSLDDTEIFKLRKEMANSLGLRRLVSNDENYLMDLALNEIIENFGILATSVARLGKKCNNPVYHRFEYFIRDPILNSFEWLGWEYCLKKMERKVQKMERFVLVTMRLTRELEVLAEHERTLRRIRRNSEGDGMKTVEWQKKVILQRQEVKNLRDMSPWVRTYDYVVRILLRSLLTILEKIKYVFRTHQMVSVSSASVPPCNSFSTLMSSVHPSDNNLCGFNSEPPGQSFSKSAQISGQHLHSHHHSTALHGKHPRLKTKQFGHVGIGPFKRCVSVGSNSQILNSRKPIGTGSFRFIGAYNVNMDKLNYSKIGSLSCSDKIYSKLRVFNTKHLLDAPTSTLGDAALSLHY…
>GhDUF668-14
MVAETWILKMGNQVSSNLKHALLLEPSSKKKKNTQNNPTSKKPQTVGILSFEVANVMSKTVHFHKSLSEPEISKLKSEILKSQGISKLVSADESYLLSLALAEKLDELTKVANVVSRLGKKCNEPALQGFEHVFGDILNGVIDVRELGLLVKDMEGMVRKLERYVNLTAKLYNEMEVLNELEHGTRKFQANPHEESKRAFEQKMIWQRQDVRHLKDVSLWNQTFDKVVELLARTVCTIFARILVVFGESALGKDGVPGRVNGRFPNRVEVVSRQLKGVLSKCSSVGSSQLGNVERSVAEKRGVSLKHGGIDSRKGEIGLFQMEDSGFPCGTSPGRLLTNCLSLGSSASRYDDGDDRSVDHDDRSSQISGCCSVANDGAKRERPNRPRLNDRLNDDHRQS…
>GhDUF668-15
MALETWLIKVKKTISNTAKISIPKNSKASKHVKSTVGVLSFEIAGLMSKLLHLWTSLSDKNVIRLRDESVSLEGVRKIVSNDESFLLGLACAEIAENVRLLAKYISRISTRCQDSGLQCFDRWFNEFANSGHDTHGWVLSSKEMEAKNKKMDRYVTITATLYKEMEELSTVENSLRKCLKEYGSSSCPSSSIKEQKIIDLQQKLFWQRQEVKYLKERSLWNRSFDMVVSMAVRSIFTILARIKLIFGIGPSILPRSLSASATVHPTENPNGFMSGPLKNPSEEENKDSRFGFFESNTKLLKPPASTLGAAALALHYANLIIIIEKMIKSPQLVGVDARDDLYSMLPNSIRSSLRGRLKGVGFSAGDPILAGEWRTALGRILGWLSPLAHNMIKWQSERS…
>GhDUF668-16
MALETWLIKVKRTISKHPNHKSNVGVLSFEIASLMTKLLHLWNSLSDRAIIRLRNESICFEGVTKLVSNNELFLLKLSCAELAENINLVAKSISRLSSRCQDAKLRCFDQCFDSFADSGHDFHLWALSSNDMEAKNKKMATLIAITAALYKEMEELSTMENNLRKCNCFSMKDQQRLYCQRQEVKHLKQKSLWNTTFDNVVSILVRSVFTILARFKLVFGLGFYKSNSNFLKPPLDTLGASALALHYANLIITLEKMIRLPHLIGLDTRDELYSILPSTIRSSLRGRLKGILGFIANDPLLAVEWRSAMGKILSWLSPLAHNMIKWQNERSFEHWDFNLLPKTNVLLLETLFFANKEKAEAAITELLVGLNYIWRFEREMTAKALFECSKIV
>GhDUF668-17
MHQNQHTNRWRVGSHAARIVESMAWLSAAVDKACGPFSPNKSTLQILAFEAAKTMSRLVALYKSLSDDELFKLRKGPMKSLGVAFLNSMDESYLLGLVCKEKLEDLGHAVVVVSRLSKQCIDDELNRFEIAYHNKKQGIIDVGNVDFNSRNVGKAIEKMEKYANATSALHGSLVALNELEVSEKKMQKPNINIDYFNEEINFQRKQVLHFRQISLWSQTFDTSVGLMARIVFVIYARICTIFGPFVPSLTCIYIPKRKALHMKVYPETSYCLLVDKEKYTEHASKSGPIMKASRTKQRATRSHSGQLCLSGSIMKASRTEPKNKSLIQSAPGNTVGAAGLALHYANIIVMAESCFHSTTSISNESRENMYEMLPISLKHDLRRKLKGHLSKDVEGSDGG…
>GhDUF668-18
MVTESWFRNLWKIPRRQDGISEKVEIGVLAFEVASLMSKLVHLWQCLSDKQVFRLREEITNSVGIKKLVSEDEEYIGRLICAEMVENVTHVAKSVARLAKKCSDPGLKSFELAFTELIQYGFDSCGWIFSLKKMEKKVKKMERFISVNATLYQEMELLADLEQTLKRMKSGDSVQESLLEFHKKVIWKQHEVKSLRASSLWNKTYDYTIRLLARSIFTIFSRIKHVFGFEHKVDVGDSKVMDSDFMHRSQSVSALMHSSVHPTENTSLPRFSSGPLGIFSTKSGPIPAPDKTNYFHSGPLVGSTPKSGSISGKNRNFNFHSGPLGRTAGRSGPLFGIDKISKIWQTNNHSAAVSGKKPHLRSNRLTQVGPFKGCMVDSGAVRNCYISSNGIHSGIPNGT…
>GhDUF668-19
MGREIVESWFGGSWWNPRKSASESTDKVVLGILAFEVAGLMSKVVNLWHSLDDREIFRLREEIANSIGIQRLVSDDESYVMDLALNEVIENFGHLATYVARLGKKCTDPVYHRFEAFINDPLLNNLEWFGWEYRWKKMEKKMKKMERFVAVTMQLTQELEVLAELEQTLRRMQRNPELDRVKLLEFQQKVILQRQEVKNLREMSPWVRTYDYIVRFLLRSLLTVLERIKNVFGTNQMVPVDRNDDFESVNSDYLSRSHSFSTVIPSSVYPSDHNLCGFSSGPLGRSFSKSMSITGKHRTNIKHLHSHYHSTALHGKQPHSRTKRAGHAAFGPFKGCMLAGSISPVLDSYKPIGTASTRFSGAYPKNIDNLKMEPLSRSYNIYSKLSIFNTKRLLNAPIS…
>GhDUF668-20
MAWRPAGINKSSNKSHVSRHTKSSSSSLSLSSSSSSSCSPTLQILAFETAKCMVRLVALYKSLSDDEFHRLRNGIMKSPGVVSLNSDDETYLLSLACEEMLENLDQAAAIVSRLGKKCIDVELNKFDIAYHNMKQGIIDARTLDFNTEHVVKTIDQMEKYACSTSVLYASLVGVDEMEISKRKKWRQNSGSKIDYFNEEISSRRKQVIHFRKISLWNQTFDKIVALMAQIVAVIFVRICTVFEPFVSSLPCITAKNRNFNRLHYNSNPKSPKGVTFRLSSITKIDKFITKIRYMDVNTEKNQMLVQSAPENTVGVAGLAVRYANVIIMAEAYFYSSKMITNDAREYMFEMLPMNLKQMLRGKLKSHWHKDAEAREGQQGVAEGWKAALEEIFEWLAPVA…
>GhDUF668-21
MVAETWIHKLGSQVSSNLKHAFLLDPSSKKKNTQNNPTSKKHETVGILSFEVANVMSKTIHLHKSLSEPEVSKLKFEILNSQGISNLISSDENYLLSLVLAEKLDELNKVANVVSRLGKKCNEPALTGFEHVYGDVINGVIDVRELGFLVKDMDGMVKKMESYVNSTANLYNEMEVLNELEQGSKKFQANPHEESKRAFEQKLIWQKQDVRHLKNVSLWNQTFDKVVELLVRTVCTVFARILVVFGESSLRKDSEFGRVNGGFRDRDDVVVSRHLKRVLSKSSSVGSVQPGNVTEKRGVTLKHRGIDSRKGEFGLFRVEDFGFACGTSPGRFFTDCLSLNCSVSRYGDNGNDDGNVGCDNRSSQISGCCSVANDGPKRERQNSSPFLQSQCSVLLNENQ…
>GhDUF668-22
MGGLCSRRSTVDNAPVGGFPHVNGHFARGSRLVFQTRQLPAKISTNSAPPAEDSADNAGMESREPFSFPEISTVPYCMNPAGIDDGIPRLSRVLSNKSRSTKSKQAAVAKVTEVGSLLGRAGTAGFGKAVDVLDTLGSSMTNLNLGSGFTSGVTTKGNKISILSFEVANTIVKGANLMQSLSMENIRHLKEMVLKSEGVQNLISRDMDELLRIAAADKREELKIFSGEVVRFGNRCKDPQWHNLDRYFEKLGSELTFEKQLKEEAETIMQQLMTYVHYTAELYHELHALDRFEQDYRRKLQEEDNSNTAQRGDSLAILRAELKSQNKHVKNLKKKSLWSRILEEVMEKLVDIVHFLHLEIHEAFGAADGDKPVKGSVSSHKKLGTAGLALHYANIITQI…
>GhDUF668-23
MGGVCSGATKEPTIKREQKTTSRGLSGKLKSKKRFSKQNGNSNSLSYANGGGLDKAPQRHDSGDFGLQFSRELKPSTPAKTTASKVSHRSSFLERAGILGLERAVDVLDTLGSSMSNLNAGSGFVTGLASRGNTISILAFEVANTIGKGANLLRSLSEQNIQFLKKEVLHSEGVQKLVSTNMKELLSIAAEDKRDELDIFSREVFRFGDLCKDPQWHNLGRYFSKLDIDNSVHKQARAEAEMTIKELTSLAQHTSELYHELNVLDRFEQEYRLKSEEVEALNLPKRGENLMLLQSELKQQRKLVRSLKKKSLWSRTLEEIMEKLVDIVTYMHQAIFEALGETASSVKKETPENSQKLGVCGLALHYANVIHQIDNIAARPASLPRNIRDTLYHGLPPTV…
>GhDUF668-24
MMLFIQEFLVKSKLEILNPPEGNAVQTISPVFRSQCRLLDAPPETLAASALALHYANVIIVIEKLAASPHLIGNDARDDLYNMLPASVRAALRARLKPYAKSLTSSVFDTELAEDWTEAMAAILEWLAPLAHNMIRWQSERSFEQQSFVSGTNALLVQTLYFANREKTEAAIIEILVGLNYVWRLGRELNAKALQECASSRNFDECLYL
>GhDUF668-25
MAWPTAETEQVDKVSRGCAMFRHEKPCSPTLQILAFETARNMSRLVALYKSLTDEEFLKLRNGPMRSPGVAFLNSTDETYLLSLICQEKLEDLNQIASIVSRLAKNCNGEELNKFETAFRNMKQGAVDVRNLDFNSRHVRKIIEKMEEYASATSLLHSSLVVLNELESSEKKMQRLKTNDCPEIPSDKTNLDLYNDKISFQRKQVRYFRQVSLWSKTFDKCVGLMARIVCTVYARICVVFGPFVPGLVCTMFTITTKNYFRRLHISRSKAFHMKVYPEAEYCLFVKEENHMRKASKSGPIPKASRFKRGPTTRFPSSELSPEAKGLGFLLSGVTATKNNVEANTRRNQRLIQSAPANTVGAAGLALRYANLITMAETYFYSTAIITDDARHLMFEMLPV…
>GhDUF668-26
MGGVCSSGTKERNTKLEQKTTTGFSGKLKSKRSFGKQKGNSDSHSHANGSGSDKTRQWDDSGDLGLQFSRELKSSTPARIAFSKGSQRNSYLGKAGIVGLEKAVDVLDTLGSSMSYLNAGSGFVTGLASRGQRISMLAFEVANTIAKGASLLQSLSEENIQFLKKEVLQSEGVQKLVSTNMNELQSIAAADKRDELDIFSREVIRFGDRCKDPQWHNLGRFFSKLDVGNSLHKQARADAEQTMQELTSLAQYTSELYHELNDLGRFELEVKRKLEEAESLNLPKRGQSLMILQSELKQQRKLVKSLKKKTLWSRTLEEVVEKFVDIVTYMHQAISEAFGVPASVTKETTENPQSLGAAELALHYANVIHQIDNIAARPAYLPPNIRDTLYRGLPPSVKT…
>GhDUF668-27
MGGLCSRRSTVDNAPCGGFPHVNGHIGQRTGLVFQTRELPAKINAKSNPPPAEDNADKVSGEPFSFPEISTAPYGTSADDINDGIPRLSRVLSDKSRSTKSKQVTAAKVSEVGSLLGRAGTAGLGKAVEVLDTLGSSMTNLNLSSGFTSGVTTKGNKIAILAFEVANTIVKGANLMQSLSNENIRHLKEVVLPSEGVQNLISRDMDELLRIAAADKREELKVFSGEVVRFGNRCKDPQWHNLDRYFEKLGSELTPEKQLKDEAEAIMQQLMSYVQYTAELYHELHALDRFEQDYRRKLQEEDNSTAVQRGDSLAILKAELKSQKKHVRSLKKKSLWSRILEEVMEKLVDVVHFFHLEIHEAFGSAGGDKPVKASVSSHKKLGSAGLALHYANIITQIDT…
>GhDUF668-28
MGGICSRSGVRDDGVGNAYGGGDFNNNYQTKAVPENSLMNPPQVMEIMEKRIEEPTDDFYDGIPRLTRGMSQKSRSVRSTQAAVAKVSEVGSRLGKAGSVGLGKAVEVLDTLGSSMTSLNPNAGFASGVATKGNELSILAFEVANTIVKGSNLMQSLSRRNVRHLKEVVLASNGVQNLISKEMDELLRIVAVDKREELKIFSGEVVRFGNRSKDRQWHSLERYFEKISRELSPQKQLKEEAELLVEQLMISVQYTAELYQELQILDKFEQDYLRKRQEEDNSAGTQKGDSLAILKADLKSQRKQVRNLKKKSLWSRSLEEVMEKLVDIVHYLILEIHCAFGSNEYQKSPEGSESGHQRLGPAGLALHYANIIMQVDTLVARSSSIPANTREALYQNLPP…
>GhDUF668-29
MALETWLIKLKKTISNTLDTARSSNHKANVGVLSFEIAGLMSKLLQLWNCLSDKTIIRLRDESLSLEGVHKIVSNDESFLLGLACAEMAENIRVVAKSISRISKRCQDSDLQGFDGWFDEFANSGHDRHGWVLSSKDMEAKRKKMDKYVTITVTLYKEMEELSTIENCLRKCKEYKPSSIKEQKIVDLQTKLFWQRQEVKYLKERCLWNKSFDMVVSILVRSIFTILARLKLVFFGFEFGYPSCLPRSLSASATVHPTQNPDTFHFVSGPLKTSSKPAVSFFESNSKLLKPPSSTLGAAALALHYANLIIIMEKMIKSPQLVGVDARDDLYSMLPSSIRSCLRGRLKGIGLSSASDPVLAGEWRTAVRSILGWLSPLAHNMIKWQSERSFEHQNLFPKT…
>GhDUF668-30
MRGGEMVAESWFGGSRLNSRNSSNLDITGKMLGILVFEVSSLMSKVVNLWHCLDDREIFKLRKEMANSLGIRRLVSNDENYLMDLALNEVIENFGNLATSVARLGKKCNNPVYHRFEYFISDPILNSFEWLGWEYRLKKMERKVQEMERFVLVTMRLTRELEVLAEHERTLRRIQRNLEGDGMKAVEWQKKVILQRQEVKNLRDMSPWVRTYDYVVRILLRSLWTILEKIKYVFRTHQMVSVSSASVSRCNSFSTLMSSVHPFDNNLCSFNSEPLGQSFSKSVQISGQHLHSHHQSTALHGKHPHLKTKQSGHVGIGPFKRCVLVGSNSRILNSRKPIGTGSFRFIGAYNVNMDKLSYSKMGSLSCTDKIYSKLRVFNTKRLLDAPTLTLGDAALSLHY…
>GhDUF668-31
MALETWLIKVKKTISNTAKISIPKNSKASKHVKSTVGVLSFEIAGLMSKLLHLWNSLSDKNVIRLRDESVSLEGVRKIVSNDESFLLGLACAEIAENVRLVAKYISRISKRCQDSGLQCFDRWFDEFANSGHDTHSWVLSSKEMEAKNKKMDRYVTITATLYKEMEELSTVENNLRKCLKEYESSSCSSSSIKEQKIIDLQQKLFWQRQEVKYLKERSLWNRSFDMVVSMAVRSIFTILARIKLIFGIGPSLLPRSLSASATVHPTENPNGFMSGPLKNPSEEENKDSRFGFFESNTKLLKPPASTLGAAALALHYANLIIIIEKMIKSPQLVGVDARDDLYSMLPNSIRSSLRGRLKGVGFSAGDPILAGEWRTALGRILGWLSPLAHNMIKWQSERS…
>GhDUF668-32
MALETWLIKVKRTISKHPNHKSNVGILSFEISSLMTKLLHLWNSLLDKAIIRLHNESIPFEGVTKLVSNNELFLLKLACAELVENIKLVAKSISRLSSRCQDAKLRCFDQCFDSFTDSGHDFHLWALSSNDMEAKNKKMATLIAITATLYKEMEELSTMENNLRKCNCFSIKDQQRLYCQSQEVKHLKQKSLWNTTFDNVVSILVRSVFTILARFKLVFGLGFFKSNSNFLKPPLDTLGASALALHYANLIITLEKMIRSPHLIGLATRDELYSILPTPLGHH
>AtDUF668-01
MGGVCSCVFKDDDKKKKLRSNDDDKSRGFSGKLKSMRRSKTSDSYYSDNYGGSRRKSSKPDEVVFNFSGELGPMPPLRNDSTKFMQRNSFMGRAGVMGLEKAVEVLDTLGSSMTRMNPSNAYLSGVTSSRGGKVTILAFEVANTIAKGAALLQSLSEENLKFMKKDMLHSEEVKKLVSTDTTELQILAASDKREELDLFSGEVIRFGNMCKDLQWHNLDRYFMKLDTENSQHKLLKDDAEARMQELVTLARITSELYHELQALDRFEQDYRRKLAEVESLNLPRRGEGIVILQNELKQQKKLVKSLQKKSLWSQNLAEIIEKLVDVVSYIRQTIVEVFGNNGLRDNEGEQGRERLGEAGLSLHYANLIQQIDNIASRPSSLPSNVRDTLYNALPATVKT…
>AtDUF668-02
MGGLCSRSSSVNNAPGGTFAHVNGHHLNNNASDLNSHSGESGLKDDPSPVTENVDDNKHTSESFSFPIVSSGSHPQNIEDGIPRLSRVLSQKSRSTKSRQAAVAKVSEVSSLLGRAGTMGLGKAVDVLDTLGSSMTNLNLSGGFSSATTVKGNKISILSFEVANTIVKGANLMHSLSKDSITHLKEVVLPSEGVQNLISKDMDELLRIAAADKREELRIFSGEVVRFGNRCKDPQYHNLDRFFDRLGSEFTPQKHLKQEAETIMHQMMSFVHFTADLYHELHALDRFEQDYQRKIQEEENPSTAQRGVGDTLAILRTELKSQKKHVRNLKKKSLWSRILEEVMEKLVDVVHFLHLEIHEAFGGADPDKPANDPPINHKKLGSAGLALHYANIITQIDTL…
>AtDUF668-03
MVSEAWIVKMRNQVSSNLKHALLLESSSTKKTPKPVSLPKQTIGILSFEVANVMSKTIHLHRSLSDTEISKLKAEVFHSEGVRKLVSSDENHLLDLSVSEKLDDLSRVASVVSRLGKKCNEPALQGFEHVYEDIVNGAIDFRKLGFLVKDMESMVKKMERFVNATCSLYCEMEVMNELEQAIVKLQRSQQHQESVKAFEQKLMWQRQDVKSLRDGSLWNQTYDKVVEMLARTVCTIYGRIETVFGGLGLRGKKDVTLKRDRSKNEASKAVNSRSVAGFKDSRRSEADEFTRAGDFNFPCGTNPGRMFMECLAMNRTIGDDDDDDDEDGGRITFPLSTARMIRSNKFGFKSRLTQHASASTIGGSALSLHYANVVIVVEKLLKYPHLIGEEARDDLYQML…
>AtDUF668-04
MVSETWFRNLWRFPKKHDGHKDKAVLGVLAFEVASLLSKLVHLWQSLSDKNVARLRDEITHSTGIKKLVSEDDDFIVRLIRDEMMENVENVAKAVARLARKCNDPKLKCFENCFSDMMKTGADPYGWQFGWKKMDKKAKKMERFISSNASLYQETEILADLEQTFKRMKSNESATDNLLEYQKKVTWKRHEVKNLRDVSLWNRTYDYTVILLVRSVFTILSRTKHVFGISYRVEASDVSSADSDFIGRSHSVSTILTPVSHKSESSGLPRFASGPLGRFTGPASGSAATRSTKMSDFLSGSLSAESPKSGPLVAEKHKRFKFYSGQLGKITSKSGPLIGMGKNNKKMGQTPERPSISSVKKQLKANRLTQVGPFKGCMVSHDGITPLSTRARNGARNSS…
>AtDUF668-05
MGSFCSKSLGINFGSEYSGSSVADDGREPDFGHSQPNGQTSLIVPGMRQLMVKDVKEQNQLKDVFSFREREAEDNFYDGIPTYTMAPSQKIRSAKSTQTAVSKVTEASKLLGKAGLGRAKDVLDTLGSSMTDLSSGGFTSGVATKGNELGILAFEVANTIVKSSNLIESLSKRNIEHLKGTILYSEGVQNLVSNDFDELLRLVAADKRQELQVFSGEVVRFGNRSKDFQWHNLQRYFDRISKELTPQRQLKEDAVLVVDQLMVLVQYTAELYQELQVLYRLEKDYEQKRREEENSANSSKGDGLAILKTELKAQRKVVKSLKKKSLWSRGFEEVMEKLVDIVHFLLLEIHNIFGGADDQPSKKGAAEYDKRLGPAGLALHYANIIVQIDTLVARASSIT…
>AtDUF668-06
MALETFLIKLKNAISSKPTSRRPHRSSPPISTTTSSVGVLSFEVARVMTKLLHLTHSLTDSNLLTPRDHSLSLEGLTKIVNGDETFHLSLVCAELADSLAHAANSVSRLSNRCTTASLRSFHRLFHEFADMGRDPHGWVMNCKDTEAKNKKIERYVSVTTALYREMEEMAILENSLRKQSLQIGIEFEEEEDYENKKDVMKVIDLQNKIERQKQHVKYLKDRSLWNKSFDTVVLILARSVFTALARLKSVFSSAAATGYMVPTVVSSLPRSLSSSSSSMNLVHPSPNDEERDKTTTSSAFLEESSRLLKPPETTLGGAGVALHYANLIVVMEKMIKQPQLVGLDARDDLYSMLPASVRSSLRSRLKGVGFTATDGGLATEWKAALGRILRWLLPLAQNM…
>OsDUF668-01
MWMPVDLRLPSGPQAALGILAFEAAAAMSKLLSLHRSLSEQEVSRLRSDTMRSPGVAYLNSTDQAFLLRLACAELVVSLDAAAAAVARLGLRCGIDFGGVYASLKAGAPDARLDPLVAKGLRVKAKKMERLVASTARLCSEMEALDELEASERKLAFRGWNRLSGPIPMQPVAPSAAGDSPGADSLQQDLKAQRIKVRRLKEESLWNQSYEKAVGLMARAACAVFSRICTIFGAFVPGLPPPLPSAATDSVQTRLSKLLNPRAVRAKASSGPITRRDGPSRVHPPVISSSCPIIGLRPSGQKAAIDWRKLLDAPASTVGGAGLDQQYANVIVSAEQLLQMEAEGRQEEANAERAEMYEMLPAKLRAAVRSKLRDWWRDPGPLDAGLAQGWKDAVDRIMA…
>OsDUF668-02
MGGLCSKGSAVDKSPSDTTLGPDRVVRGHERGGAGVGVGKEERKTVAREAAAKRIQEQQQQQRQQPASVQEAPASRAPIDARELPWDGVPNLARLPSQKSGMGVAKASAAKVSEVSSILGRASTVGLGKAVEVLDTLGSSMANLNINSGFGSGTTTKGNKISILAFEVANTIVKGCNLMRALSKESIKHLKEVVLHSEGVQNLISKDMDELLKIYAADKREELKVFSTEVVRFGNRCKDPQWHNLDRYFDKFASERTPQHHLKEEAESVMQQLVTCVQCTAELYHEMHALDRFEQDYQRKQQEEDGSSVHQRGENLNILKQEVKSQRKHVKSLQKKSLWSKNLEEVMEKLVDIVHFLHLEIHNAFGRSDNEESQEPTKRRNRLGPAGLALHYANIISQI…
>OsDUF668-03
MQQLLTLVRHTADLYHELHALDRFEQDYRRKLEEEKKSVAFERGDTVQIIRQELKSQRRHVKSLKKKSLWNKMLEDVMDKLVDIVHFLHVEIQESFGTYDGALQLNQPSESRQTLGSAGLSLHYANIISQIDNIVSRSTVPPQSTRDALYQGLPPTIKSALRKKLHNCPQPQEVPITEIRSSMERTLQWIIPIANNTARAHHGFGWVGEWANTGNDAMRRAAGQPDVIKIETFYHADKAKTEACILDLVLWLHHLISYSRPSNGGRSRSPSRSPVRSPPLTPPHQVPTTTSSSSPPPPAVARPSGGTGGGLTREDRAMLQDVYAGRRRRAPCHSRSQELSSARGGGGAGGDSSSAVAAAAQLSKNDRLSKSSNDAPARSGGGGGGGKLFPLSRRPSSAV…
>OsDUF668-04
MPAGARSWLADLRARFGGGAREEAGLGILAFEAAAAMSRLVSLHRSLSDVEVRRLRADALRAEGVARVTSTDQSLLLRLACGEFVADLDHAAGTAARLGARCCAGAPFLHDFDRVYAEAKRGNGLARLDATVGFYRGAAKRFRKMERHVAATAKLYAEMDALSELEASERRMEQWMRHSGPIPAQPGPSAKRQVPEPGEKLIRELNSQRQKVRRLMESSLWSVAAHKVSKLMAKSVLAVLARISITFGAYVPGLPLLTVGRAWALRRTSGPLQQAASPAAAIRHSAPIFRQKDTAFSASESIKPPASTVGGSGMELRYANMIVCAEMLLRQLWPTIHSNEVDAGMDLSKRDELYKMLPVTIRTAVKAKLRESWRGQPVDEAAAAASMDAVDRMLRWLGP…
>OsDUF668-05
MPMAIESWLTKVRSAIISSKPSPSSSSSSSWRSKTVGILALEVATLMSKLVHLWRSLADAALARLRHHLINLDGVRKLVSHHDAALLALACAELTDALRVAAHSVAALATRCADPFLRDFADAFADFADTGRDPHRWVSTWKDMDTRAHKMDKQVAATSALRTAMEDLADAEHGLRKLLQTSSSRRLSATNISLAAEQQQLIFAKKQEVKHLKQTSLWSSTFDAVVSSLARAAFTILARIKLVFGAAHDHRPTTTPLHRSLTLSSAVHPSSVDVQVQPPVSRKSMSMDMGMGEALYLERQRQSGLLERSAAALVPPPGTLGAAALAPRYAWVIISIERMARSPRLVGAEERDELYGMLTASVRAQLRARLSGTVAAAEPGLAGQWRAAVGGILEWLAPM…
>OsDUF668-06
MVAEPLVHKVLSMATSSSSSRKVKPVTTSSGKGGAAAAAAAAVEGVVDDGRVGILSFEVANAMSRAANLYRSLSDAEGGAAARPALPRLPGGPIARIDMDTPRSVNFRSNCGASPGKMFMECLSLSSSVSWKDGFEDEFLEDASCISTIRSGMLLPFSGEQGVSTMATKSGKVGRRARFGPKSTVTSLAPPSTIGGSALALHYANIVIIIEKLLRYPHLVGEEARDDLYQMLPSSLRAALRKSLKTYVKSMAIYDAFLAHDWRETLEKTLTWLAPMAHNMIRWQAERNFEQQQIVLKGNVLLLQTLYFADREKTEAVICELLVGLNYICRYEQQQNALLDCSSSLDFDDCMEWQLQ*
>OsDUF668-07
MDCYMLKSRRLVGVADAWSVDDGADGISGFPDAMSAAAHKQMVTGAEEAMLGKLELDSQSNLFSNSDDFLLSGSSKLGISASEDIDLPGKQGLPESTTDRPGSNGSSRVPRLRVLGTAGMAGFGKAVDILDTIGCLVTTSLSTDGGFISRAKTKGCPISILAFEVANTILKGATIMQSLSEDTVTYFKQVVLPSEGVQNLISSDMSVLMRIVANDKREELKIFSQEIVRFGNRCKDPQWHNLDRYFVKLESENPPQKQLKETAVAEMQKLMDLVHRTTDLYHELHALDRFEQDYRCKLTVKGNSYQKDNLPGENIEVVRIELKSQRNYVKSLKKRSLWSKTLEDIVEKLVDIVQYLHFEINASFGSSDEGELSSESTEDCQRLGPAGLALHYANIIIQI…
>OsDUF668-08
MGGLCSKVSAVDKSPSDTTLVRDQIVDPEPALTKRAKSPVVEEATAKRVEDQQQSFAFLESVVPGLAVYNGADAGQAGSRTPQLARTLSQKAGLGKTKAGAAKVSEVSSLLGRAGTVGLGKAVEVLDTLGSSMSSLNTSSGFISAAKGDKISILAFEVANTIVKGSNLMRALSKTNIKHLKEVVLYSEGVQHLISKDMDELHKIAATDKREELEIFSKEVVRFGNRCKNPQWHSLDRYFEKLASERTPQHRLKEDAESVMQQLIICVQYTAELYHELHTLDRFEQDCRRKQQELDGLGSRGDSLHMLKQDVKSQTKHVKSLKKRSLWSKNLEEVMEKLVDIVHFLHLEINNAFGLADSEAPQEPAKHHNRLGPAGLALHYANIINQIDTLVSRSSLIPP…
>OsDUF668-09
MRWADDGGEGDDDDDLRLPGAGRRSPSLGILAFEAASTMTKLLSLHRSLSEKEVARLRSNTMRAAGVEYLSSTDQAFLLRLACAEAVAALDAAAAAVARLGARCGLDFAGPYASLKAGAPDARLDQFVAKGLKVKAKRMERLVAATAKLCAEMEALDKLEAAEQKLARRGWGRLSVPIPSPAAAAVDAVGSDSLRLGIRAQRARVRRLKEESLWSQSYEKAVILMARAACAVFVRVCVVFGAHVPGLPPPLPPAEAVHSRLSKLLLHPMSAAAQPRSLSGPIQRRDVPLRIEMSSNSCPIIRSHCQQPWQTSPPGVDWRKLLEPPPGTVGGAGLDLQYANVITTAERLLLETDHAEGRQRHEEARAELYAMLPSKLRAAVRAKLRGWWRERGAAAAVAV…
>OsDUF668-10
MGCVCSRRFRDDAAPRSVQPLAAAYEARRGRYGPGDFDSGELAIPPPKLLTSHKVPETGTLLGRASIAAVEVLDTLGSSMTNLNHGSGFLSGGTNRGNRVCILAFEVANTIAKASNLWRSCSDTSIKELKEEILRSDGVQILVSSNSSELLYIAYVDKRDELDIFSREVIRFGNLCKDPTWHNLGRYFNKLTTDFAPQDHSKEHMETTIQQLINLAQNTSELYHELHALDRFEQDFQRKFHEEESVPAARRESVMILHSELKRQRKLVKTLKKKSLWSRTLETIVEKLVDIVVFLHKQIRDSFSEAVSVGADLFNSEQAQNKRLGSCGLALHYANIINQIENIVSRPLSLPPSARDNLYHGLPVTVKSALRSRLQSVNAQEERTVAQIKAEMQKTLRWI…
>OsDUF668-11
MDTSVRRTSKGISGNPSEDSNEPVAKSPTLKTVIGSIRNYIATKKGRKIKILAFEVANTIAMGSNLMNFLSEENIRYLKRVVLQNQGVQSLISDDQSQLLALVGDEIRQQFKDFAASVARLGNMCRDPKWHNLEGHFSGLEYGPITQEYSHEKAASKMEDLMELVTKTKILFEALRRLGVSEKMYREAKQTGMPLETFQNAVNIEKEIVQSAKKKALWVKKIEKIVEELVYIVHYLPSEINCVFYKEHEEDRSVKANGSPQQTLGSADLQLNYARIVIAIQVLVSVASSVPQCAVDSLFHALPYRIRSVLLPRMRHGDFDDQRTETQIADEMTRRLEWLYPMAEFTIRLSQHTGMIRECLVSGSLSDRDQRKMLKVQTLYHADKMKTDGCIIDMVMDLH…
>OsDUF668-12
MRKLSGGGGERRVVGAVAFEVAALMSRAAGLWRALGDAEVGRLRGDRVRLEGVRLLVADDDAALLSLALAEMAAACADLSRAVARLSARCADPLLRRLDALFAALVRGGRLADPHRLRYSAARKMDRKARKMQRLVASTALLSQELDVLAELEQAAAGGLRRSGTRRKGAASGGGGEGEAARRVAQQRQEVDRLRAASLWNRSFDYAVRLLARSLFTIVARIAQVFGLEPKNVATMDDDAMISLATTRLSWTNSFVGSVHSLVYPSDFAADTHTPRRSLLDAKSGKVSNGGEHVRRFLVSRSQSLRQLKWPMAGKHLIGCMVSGSRSPDSERWKIHGDGDLPLSFSYYVSASNDDYSSINSPFQGDHTNSNLSIVFESSSHNWVMNAPAVTTLGAAALA…
>IbDUF668-01
MGGVCAGGTARNRAEGRHERSSKGSKKSKSVKKSGQENKDTDSYEYSNASAAAKKMQNLYDSGDLHLSISRELKPSTPVRTVANKAPHGSSFIGKAGIVGLEKAVEVLDTLGSSMTNLNNSGFITGAGSRGNKIFILAFEVANTITKGASLLQSLSEESIQYLKEEILHLQGVQELVSTDMKELLAIAAADKREEFDVFSREVIRFGNMCKDPQWHNLDRFFSKLDSDPVNSKQLREEAEMTMQELATLAQHTSELYHEMHTLDRFEQDYRRQVDELLSLNLPRKGESLEMLHSELKQQRKAVRGLRKKSLWAKGLEEVVEKLVDIVTFVHHEINNAFGDSGLTYAVKDTAKRPERLGAAGLALHYANLITKIDNIASCPTSLPPNTRDTLYNGLPSAV…
>IbDUF668-02
MVAESWLRSLWKTTKKRGGGSSEKQIIGVLAFEVASLMSKMVHLWKSLCDKQVGSLREEIKNSPGIRKLVSEDDAYIARLICSEMIENLGNVAIAVARLAKKCNDPLLRSFEQAFNDLLKLGIDPYGWHLSWKKMDRKVKKMERFVVINSNLYQEMECLADFAQTLQRMKCNDDADIISLVEYEKKVSWKQQEVKHLKEVSVWGRSYDYVVRLLARGVFTIYCRIGHVFGVNPVGDQEMRDSKVLESDNIHRSQSVAYTQSSVHPAETSLSRFSSEPIENLLTRSGPISRTANISTFYSGPLRNSTSTASLAPGGHKAVNFHSGPLEMSKAKPGQTTRVNRSAFKWWRLRDHSGKLQGKTPISKSNKLTSVVGENGFPMSNSYINTNGGYSGDLSGAKP…
>IbDUF668-03
MVAEPWLLRMGNQVSTNVKHALLLENSKKSGALRGKEFIGILSFEVANIMSMIIHLHKSLTDPEIVKLKNEILGSVGIRTLVSDDETKILQLALVEKLDDLNRVASVVSRLGRKCTIPALQGFEHVYGDITAGVIDVKELEFLVKDMEGMVRKMERYVSSTARLYSEMEVMNELEVATKKFRQNQHEETWKAYEQKLAWQKQDVRHLKDVSLWNQTYDKVVELLARTVCTVYARISAVTDDIIARRASISVSISRGESLQHVKQEPEQQSGQIGLERSSGDSIKPVLSKRNSGSHSGPTERRGVHRRNTSYHPPNGLQKSQGGLFCSKDFNFACGVGLMECLSLSSASKYVDDNNAGSDDRSSQVSGCSSVASGARKEQWNFSRMPKGSTSNNARFGPK…
>IbDUF668-04
MVAESWFRNIWKTKKKKHDSASEKQLIGVLAFEVASLMSKLVHLWQSLGDKQVARLRDEVMNSVGIKKLVSEDDIYIARLICREINENLRNVAMVVTRLAKKCSDPLLKSFELAFNELLKTGADPYGWQLTWKKMDRKVKKMEWFMEINANLYQEMETLSDLEQTLRRMKGNGDADNIALVEYEKNVSRKQQEVKYLKEVSLWNRSYDYTVCLLARSVFTIFGRVGNVFGINPAGDQEVKKLKLLESDHIHRSQSVAHSQSSIHPTESSLSRFSSEPISSLLTKSGPIPKTTNTNAFCSGPPRNPTSTAHPISGGNKSVNFYSGPLGMSTEKSRTIARPKKSGIKWWQSHEHSGSLQGKTQISKANKLGTIGPLKGCVMGGNGSPVSDCYLNPVDSSSG…
>IbDUF668-05
MALETWLIKVKKTIARATAPHHHAAKPSVMVKKSAQVGVLAFEISGLMAKLLHLWQSLSDKNVTRLRGECLALEGVRKIVSNDDVFLLGLACAELVENLRVVAKSVTRISRKCDDPKLRSLDRSLNEFANSGKDPHGMVLGWKEMEAKIKKMDRYVSSTALLHKQMDELSGLEKKAAQAEGLESSAREKRLGDLHQKIQWQKQQIKYLKEKSLWSRTFDTVTLLLARSIFTILARTKIVFGINNSTLPYPSTLPRSLSASATVHPSENPPPPFVSGPLLQEPPNKFFRSNSDMLKPPATTLGAAALALHYANLIIVMEKMIRSPQLVGVDARDDLYSMLPNSIRSALRARLKGVGFSATDPALAGEWRDALQKILGWLSPLAHNMIKWQSERSFEHQNL…
>IbDUF668-06
MGGICSKDSEKSVNPYASRDSEEHSYSQAQKLHRNNESPARKSREAMAPPALPESMSKEAEEQQPKDQPGSGYSSSEDELYDGIPRYRRSRSQKSRSRRVAKEILESVGLDKAVEVFDTFGTGGFVSGGTNKGNELLIVSFEVANTIVKASNLMQSLSKRSICHLREVVLLSEGVQKLVSTDMDELLSIVAIDKREELKVFVGEVVRFGNRCKAPQWHNLDLFFEKCRRERTPKKQLREEAELVMQQLMVLVQCTAELYHELQTLDRLRQDYQLKQKDAKFSSSRKDYGLSILAAEFKSQKKEVRSLKKKSLWSRSLEEIMEKLVDLVLFLNQEINNAFGSSDDDRAKKAFERSQQRLGPAGLALHYANIILQIDSIVARSSSMPPNSRNMLYQSLPTN…
>IbDUF668-07
MGAVCAGGTVRDRSEVLKERSSGSSKKLKSMKSFLNEDINADSNEYPDMGTMGRTHNHNLYDSGELHLSISRELKPATPARTGNNKGPQVSSFLGKASIVGLEKAVEVLDTLGSSMTNLNNSGFISGAAGSRGNRIYILAFEVANTITKGANLLQSLSEESVQYLKEEILPSKAVQELVSTDMNELLAIAAADKREEFDVFSREVVRFGNLCKDPQWHSLDRFFAKLSSEPLSHKQLKEEADRTMQELSTLAQHTSELYHELHAVDRFEQDYQRKIEELESLNLPRKGESLMMLHSELKHQRKLVRGLKKKSLWSKSLEEVVEKLVDIVTFIHQEILEAFGDDVLKYIDREPTKKPERLGVAGLALHYANLITQIDNITSRPTALPPNTRDALYNGLPP…
>IbDUF668-08
MGAVCPGGTARSRSVVHHERSSGRPRKSKGMKNYEEETKGSSYDMDGSGKMQNLYDSGELSFSGELKPSTPARFGAANMASQASSFLGKASIVGLEKAVEVIDTLGCSVANLNNSGFIFVMGSKGNGISILAFEVANTITKAVNLLQSLSKENVEYLKDEILCSKSVRELVSTDKEELLSIAAADKRTEFKVFSQEVVRFGNMCKDPQWHNLDRYFSTLDSNPVSHEQFREEADMTMQELVTLAQHTSELYHEFHSLDRFEQEYRKKIVELDSLSLPRKGESLMMFHSDVKHQRKLVRGLKKKSLWSKSLEEVVEKLVDIVIFIHQEILEAFGDGGLMRMGKEPAKKRERLGMAGLALHYANLITKIDNIALRPTSLPPGTRDALYNALPPAVKTALRS…
>IbDUF668-09
MGAESVTDSWFSNFWRTSRKSSASEPEKSTIGILAFEVATLMSKVINLWQLVGDRQIARLREEITTSLGIQKLVSEDDDYLMDLALAEIINNVRCVAKSVVRLGKRCTDPTYQNLEKLFDDPVEMDLNGCGWEYKLKKMERKVKKMERFVASTMQLTQELEVLAEHEQTLRRLQAGANSGHVKLIEFQHKVVWQRQEVKNLREMSPWVRTHDYIVRLLLRSIFTIIVRIKYAFGINQIGDIEESTNSEDFSTDSLVRSRSISAILQSSIYPSESNMSRLYLGPLGRSFSSLGLSSDKSKSSNRKLLTRQPSVLCGKPSQMRSRRLAPIASFGGCIKAGNDSPVIESCMPTNGDVLKSNDCYQRYTDDSKDTNGLALCGGIASAKVSFFNLKHKLLVAPP…
>IbDUF668-10
MVAEPWLLRMRNQVSNKKLSSNQQEKQVIGILSFEVANVMSKVVHLHKSLSDPEISKLNNEILKCVGIRALVSGDETRLLELAFVEKLDDLDRVASVVSRLGKKCTIPALQGFEHVYGDITSGLIDVREFGFLVKDMEGMVKKMERYVGSTASLYREMEVLNELELGLRKFQQNQHEETRKAYEHKLVWQKQDVRHLKDASLWNQSYDKVVEMLARTVCTVYARINTVFGVRIVRRDSLSVSNPGAQFQVKHDFEEKCSRIDSECTQADSKRLALSLSKKNPNNHSGVIALERRSTSYLARSEGGLFSAEDFNFACGMGPGRLFMECLSLSSATRRDDDDDDIGSDDRTSQISRCCSVTSGTRRQTANSSRFFSRSLSGVPFSGNPRQFRGSMSNNSAR…
>IbDUF668-11
MGGLCSRRATAEGASAGGLSHVNGHLNFGAGMVYQSRGLPTQVNANPTQSRAVESLDKHPNDSPFSFPEIDAISRGAEMDDINDGIPRLSRTLSQKSRSTRSKQVAMAKVSEVSSLLGRAGGKAYDVLDTLGSSMTNLNLSGGFASSMATKGNKISILAFEVANTIVKGAKLMNSLSSENIKNLKEVVLPSEGVQRLISKDMDELLRIAAADKRDELKIFSGEVIRFGNRCKDPQWHNLDRYFEKLESELTPNEQLKVEAEGVMQQLMTMVQYTAELYHELHALDRFEQDYRRKAQEDDNSSAAQRGDGLAILRAELKSQKKHVKSLKKKSLWSKILEEVMEKLVDIVHFLHLEIHATSGSADGGKPIKNHHLRLGSAGLALHYANVITQIDTLVTRSG…
>IbDUF668-12
MVAERWLLRMGNQVSSNVKHALLLENSKKLNSKKQVIGILSFEVASVMSRIIQLYSSLSDHEVHKLKNEILKCVGIRTLVSDDETRLLELALVEKLDDLGRISSVVSRLGKKCSIPALQGFEHVYGDVTSGAIDVKELGFLVKDMDGMVRKMERYVNSTASLYGEMVVLNELEVATRKFQHNHHEESRKAYEQKLAWQKQDVRHLKDVSLWNQDYDKIVELLARTLCTVYARISTVFGNRIVRKVLLSSVGSTQFEYGGGLHQAKSGQVDRECMPFDTTKRVMSKKNNCSHSGGHIGRRTVERRNASYHPQNGLQRSEPGFFCPDDFNFACGMGPGRLFMECISSSSALKDDDDDDDVGTNNGTSQRYCSVSSGMRMEQPNFPGCFSCSSSDVPFSGQG…
>IbDUF668-13
MSVMMVAETTSDSWLTNILGPPRKGSVLEPKRSKIGVLAFEVATMMSKVINLWQLVSDAQIARLREDITNSPGIKRLVSEDDEYLMDLALAEIIENLECLAKSVVRLGRRCTDPVYQNLDQVFDASFEMDLSSSVWQYRLKKMERKVKKMERFVAATNQLYQEIEVLGEHEQTLRRLKSGSNPSQLQLLEFQPRVMLQRQEIKNLQEMSPWVRTYDYIVRLLFRSIFTIIMRIKFALGINLIGNGEGSNQFEDFNNNSFAHNRSVPVMLQSSVYPSENNMSRVYSGPLGKSFSNLGLDGDKNQSNNRELLTRQSSVRRGKPSQMRSRPLASIGSLGVCMKAGSYSPAIDCYAPSNSGISRSDRSSLGVAGAFDEMNALASSCKGAKTTLFNFKRKLLVA…
>IbDUF668-14
MSSEAPFLHPQILPISPLSLSPDQKTPHFDRQRCTPAKNNPPWPTTQSNTWFLLKSIMGCLPEISSRVHDHRAEAKNDDQLGILAFEAAKTMSRLLSLYKSLSNNHLAVLKKEMKSQGVAFLNSEDDNLLFSLACAERLEELDKITTGVARLSRRCHDYELSRFDLVYTDLKLGVVEFGRLEYGSRDVQKKVEKMEKLVSATAELYAALEVQAEIEICERKTKDWKGRANLEIFAQRVKYQRKLVHHYKEISLWTKTFDICVGLMARIVCIIYARICSVFGPFFPILPSFPLRKTPSPDIRPDYCLIEPIKEKITSHSGPLTSKAEPISVRFYSRKSVFFFRGEDPFGESKKDRILHAAGPTTVGGSGLALRYANVILSVEKYLDPTISMDEDSRASLY…
