# Supplementary material for: Genome-wide identification, characterization and expression analysis of the DUF668 gene family in tomato
Source: PeerJ. 2024 Jun 18;12:e17537. doi: 10.7717/peerj.17537 (PMC11192028; doi:10.7717/peerj.17537)
Supplement: Table S3 [file peerj-12-17537-s004.xlsx]

## Sheet: Sheet1
Supplementary Table S3 The Ka and Ks values of duplicated SlDUF668 gene pairs.
Duplicated gene pairs	Ka	Ks	Ka/Ks	Duplication type	Types of selection
Solyc06g065460/Solyc11g017000	0.114336	0.587417	0.194643	Segmental	purify selection
Solyc09g008930/Solyc11g007660	0.433837	2.57764	0.168308	Segmental	purify selection
Solyc04g081510/Os06t0716000-01	0.41847	4.58948	0.0911804	Segmental	purify selection
Solyc11g017000/AT1G34320.2	0.224678	NaN	NaN	NaN	NaN
Solyc11g007660/AT5G04550.2	0.345639	2.21719	0.15589	Segmental	purify selection
Solyc03g007090/AT5G51670.2	0.381855	NaN	NaN	NaN	NaN
Solyc03g007090/Ib-Ibat.Brg.05A_G015350.1	0.198734	NaN	NaN	NaN	NaN
Solyc04g081510/Ib-Ibat.Brg.06B_G021840.1	0.163723	1.15094	0.142251	Segmental	purify selection
Solyc09g008930/Gh-Gohir.A01G210200.1.v2.1	0.339723	2.54184	0.133652	Segmental	purify selection
Solyc09g008930/Gh-Gohir.D01G199100.1.v2.1	0.336778	2.66355	0.12644	Segmental	purify selection
Solyc09g008930/Gh-Gohir.D09G138300.2.v2.1	0.414378	1.87193	0.221364	Segmental	purify selection
Solyc04g081510/Gh-Gohir.D02G098000.1.v2.1	0.271959	2.0091	0.135363	Segmental	purify selection
Solyc10g084880/Gh-Gohir.A04G084500.1.v2.1	0.449688	NaN	NaN	NaN	NaN
Solyc10g084880/Gh-Gohir.D04G123300.1.v2.1	0.425548	NaN	NaN	NaN	NaN
Solyc11g007660/Gh-Gohir.A01G129300.2.v2.1	0.275429	1.80425	0.152656	Segmental	purify selection
Solyc11g007660/Gh-Gohir.D01G199100.1.v2.1	0.412818	2.09168	0.197362	Segmental	purify selection
Solyc11g007660/Gh-Gohir.D01G118900.1.v2.1	0.275111	1.79253	0.153477	Segmental	purify selection
Solyc03g007090/Gh-Gohir.A09G043500.1.v2.1	0.214477	NaN	NaN	NaN	NaN
Solyc03g007090/Gh-Gohir.A12G263900.1.v2.1	0.264589	NaN	NaN	NaN	NaN
Solyc03g007090/Gh-Gohir.D09G045000.1.v2.1	0.206712	NaN	NaN	NaN	NaN
