# Supplementary material for: Genome-wide identification, characterization and expression analysis of the DUF668 gene family in tomato
Source: PeerJ. 2024 Jun 18;12:e17537. doi: 10.7717/peerj.17537 (PMC11192028; doi:10.7717/peerj.17537)
Supplement: Table S4 [file peerj-12-17537-s005.xls]

## Sheet: Sheet1
Supplementary Table S4 Synteny gene pairs between tomato and other four crops.
SlDUF668 Gene Name	GhDUF668 Gene ID	SlDUF668 Gene Name	AtDUF668 Gene ID	SlDUF668 Gene Name	IbDUF668 Gene ID	SlDUF668 Gene Name	OsDUF668 Gene ID
SlDUF668-01	Gh-Gohir.A09G043500.1.v2.1	SlDUF668-01	AT5G51670.2	SlDUF668-01	itb05g14710	SlDUF668-03	Os06t0716000-01
SlDUF668-01	Gh-Gohir.A12G263900.1.v2.1	SlDUF668-08	AT5G04550.2	SlDUF668-03	itb06g19930
SlDUF668-01	Gh-Gohir.D09G045000.1.v2.1	SlDUF668-09	AT1G34320.2
SlDUF668-03	Gh-Gohir.D02G098000.1.v2.1
SlDUF668-05	Gh-Gohir.A01G210200.1.v2.1
SlDUF668-05	Gh-Gohir.D01G199100.1.v2.1
SlDUF668-05	Gh-Gohir.D09G138300.2.v2.1
SlDUF668-07	Gh-Gohir.A04G084500.1.v2.1
SlDUF668-07	Gh-Gohir.D04G123300.1.v2.1
SlDUF668-08	Gh-Gohir.A01G129300.2.v2.1
SlDUF668-08	Gh-Gohir.D01G199100.1.v2.1
SlDUF668-08	Gh-Gohir.D01G118900.1.v2.1
